# Supplementary material for: Actinoflavosides B–D, Flavonoid Type Glycosides from Tidal Mudflat-Derived Actinomyces
Source: MDPI journal article supplement (doi:10.3390/md20090565), 2022-09-05
Supplement: s1 [file s1]

## *Supplementary Material for*

# **Actinoflavosides B-D, novel flavonoid type glycosides from tidal mudflat-derived actinomycete**

**Hyeongju Jeong<sup>1,†</sup>, Se Jin Jo<sup>1,†</sup>, Munhyung Bae<sup>2</sup>, Young Ran Kim<sup>1,\*</sup> and Kyuho Moon<sup>1,\*</sup>**

1 College of Pharmacy, Research Institute of Pharmaceutical Sciences, Chonnam National University, Gwangju, South Korea; 217843@jnu.ac.kr (H.J.); 216446@jnu.ac.kr (S.J.J);

2 College of Pharmacy, Gachon University, Incheon, South Korea; baemoon89@gachon.ac.kr (M.B.)

† These authors contributed equally to this work.

Corresponding Author

\* Correspondence: kimyr@chonnam.ac.kr (Y.R.K.), khmoon@jnu.ac.kr (K.M.)

## *Table of contents*

**Figure S1.**  $^1\text{H}$  NMR spectrum of actinoflavoside B (**1**) at 600 MHz in DMSO.

**Figure S2.**  $^{13}\text{C}$  NMR spectrum of actinoflavoside B (**1**) at 150 MHz in DMSO.

**Figure S3.** COSY NMR spectrum of actinoflavoside B (**1**) in DMSO.

**Figure S4.** HSQC NMR spectrum of actinoflavoside B (**1**) in DMSO.

**Figure S5.** HMBC NMR spectrum of actinoflavoside B (**1**) in DMSO.

**Figure S6.** ROESY NMR spectrum of actinoflavoside B (**1**) in DMSO.

**Figure S7.** TOCSY NMR spectrum of actinoflavoside B (**1**) in DMSO.

**Figure S8.**  $^1\text{H}$  NMR spectrum of actinoflavoside C (**2**) at 600 MHz in DMSO.

**Figure S9.**  $^{13}\text{C}$  NMR spectrum of actinoflavoside C (**2**) at 150 MHz in DMSO.

**Figure S10.** COSY NMR spectrum of actinoflavoside C (**2**) in DMSO.

**Figure S11.** HSQC NMR spectrum of actinoflavoside C (**2**) in DMSO.

**Figure S12.** HMBC NMR spectrum of actinoflavoside C (**2**) in DMSO.

**Figure S13.** ROESY NMR spectrum of actinoflavoside C (**2**) in DMSO.

**Figure S14.**  $^1\text{H}$  NMR spectrum of actinoflavoside D (**3**) at 600 MHz in DMSO.

**Figure S15.**  $^{13}\text{C}$  NMR spectrum of actinoflavoside D (**3**) at 150 MHz in DMSO.

**Figure S16.** COSY NMR spectrum of actinoflavoside D (**3**) in DMSO.

**Figure S17.** HSQC NMR spectrum of actinoflavoside D (**3**) in DMSO.

**Figure S18.** HMBC NMR spectrum of actinoflavoside D (**3**) in DMSO.

**Figure S19.** ROESY NMR spectrum of actinoflavoside D (**3**) in DMSO.

**Figure S20.** TOCSY NMR spectrum of actinoflavoside D (**3**) in DMSO.

**Figure S21.** Methyl decoupling  $^1\text{H}$  NMR spectrum of actinoflavoside B (**1**) at 800 MHz in DMSO

**Figure S22.** DQF-COSY NMR spectrum of actinoflavoside B (**1**) at 800 MHz in DMSO

**Figure S23.**  $^1\text{H}$  NMR spectrum of S-MTPA ester (**1a**) for actinoflavoside B (**1**) at 600 MHz in DMSO.

**Figure S24.** COSY NMR spectrum of S-MTPA ester (**1a**) for actinoflavoside B (**1**) at 600 MHz in DMSO.

**Figure S25.**  $^1\text{H}$  NMR spectrum of R-MTPA ester (**1b**) for actinoflavoside B (**1**) at 600 MHz in DMSO.

**Figure S26.** COSY NMR spectrum of R-MTPA ester (**1b**) for actinoflavoside B (**1**) at 600 MHz in DMSO.

**Figure S27.**  $^1\text{H}$  NMR spectrum of S-MTPA ester (**3a**) for actinoflavoside D (**3**) at 600 MHz in DMSO.

**Figure S28.** COSY NMR spectrum of S-MTPA ester (**3a**) for actinoflavoside D (**3**) at 600 MHz in DMSO.

**Figure S29.**  $^1\text{H}$  NMR spectrum of R-MTPA ester (**3b**) for actinoflavoside D (**3**) at 600 MHz in DMSO.

**Figure S30.** COSY NMR spectrum of R-MTPA ester (**3a**) for actinoflavoside D (**3**) at 600 MHz in DMSO.

**Figure S31.** Key ROESY correlations of the 2, 3, 6-trideoxyaminosugar of actinoflavoside B (**1**).

**Figure S32.** 16S rDNA sequence data of JML48.

**Figure S33.** 16S rDNA sequence data of JMS33.

**Figure S34.** UV spectrum of actinoflavoside B-D (**1-3**).

**Figure S35.** HR-TOF-MS data of actinoflavoside B (**1**).

**Figure S36.** HR-TOF-MS data of actinoflavoside C (**2**).

**Figure S37.** HR-TOF-MS data of actinoflavoside D (**3**).

**Figure S38.** IR spectrum of actinoflavoside B (**1**).

**Figure S39.** IR spectrum of actinoflavoside C (**2**).

**Figure S40.** IR spectrum of actinoflavoside D (**3**).

**Figure S41.** H-4''' decoupling <sup>1</sup>H NMR spectrum (800 MHz) of actinoflavoside B (**1**) in DMSO.

**Figure S42.** H-5''' decoupling <sup>1</sup>H NMR spectrum (800 MHz) of actinoflavoside B (**1**) in DMSO.

**Table S1.** Minimum inhibitory concentration (MIC) of **1-3** against Gram-positive and Gram-negative bacterial strains.

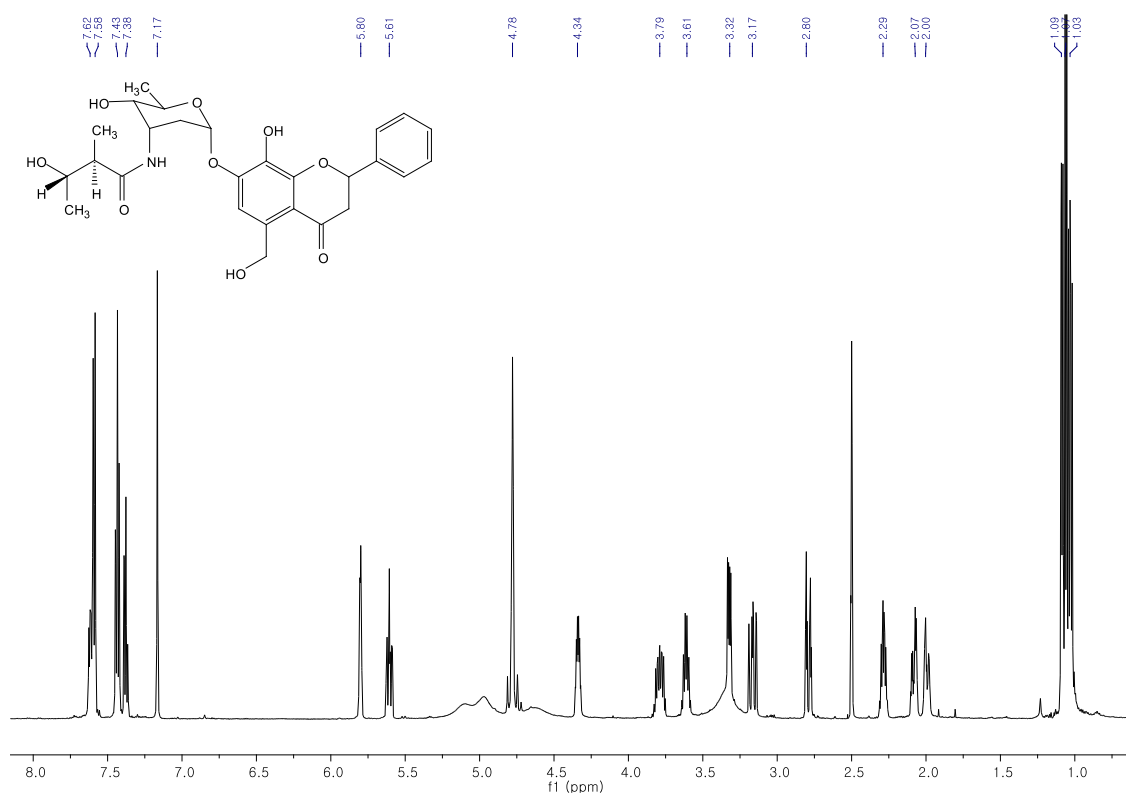

**Figure S1.**  $^1\text{H}$  NMR spectrum of actinoflavoside B (1) at 600 MHz in DMSO.

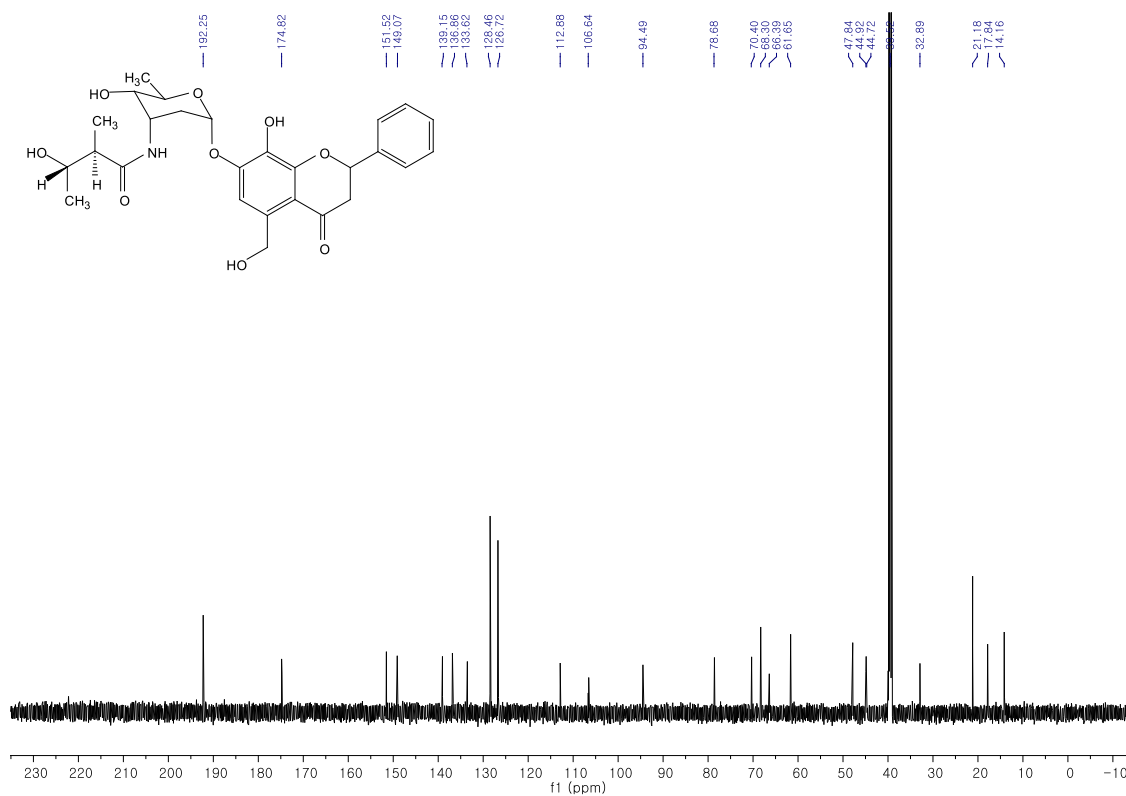

**Figure S2.**  $^{13}\text{C}$  NMR spectrum of actinoflavoside B (1) at 150 MHz in DMSO.

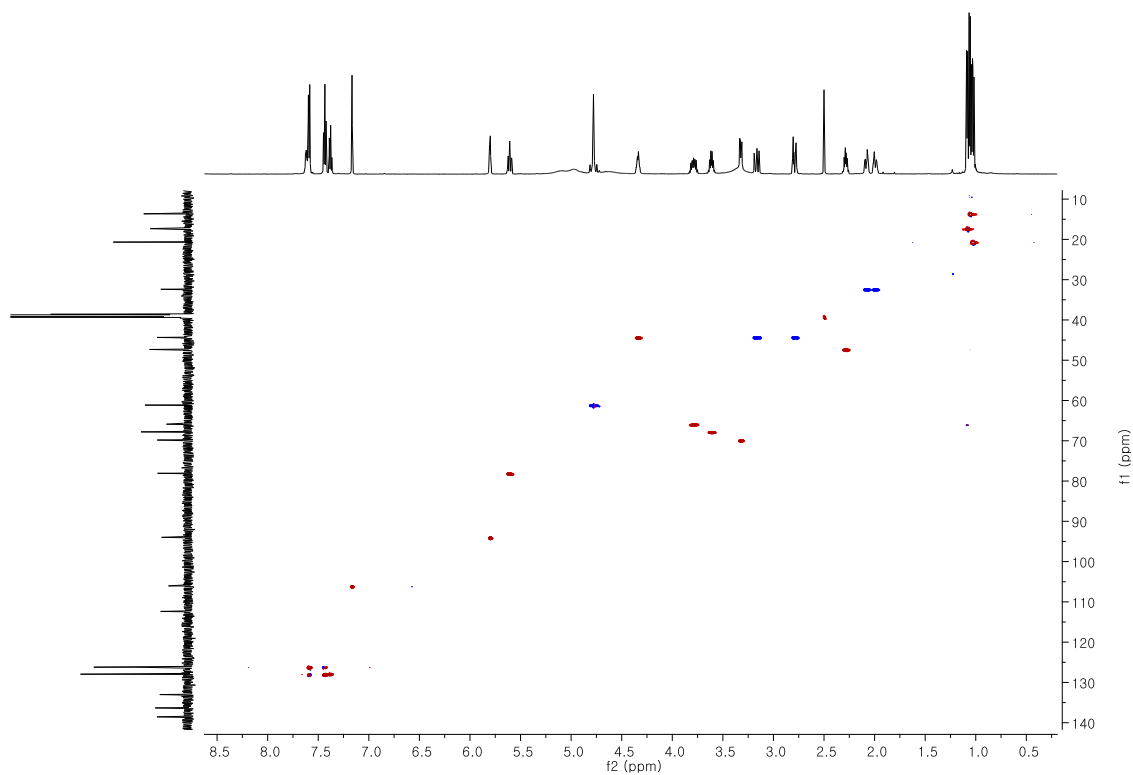

**Figure S3.** COSY NMR spectrum of actinoflavoside B (**1**) in DMSO.

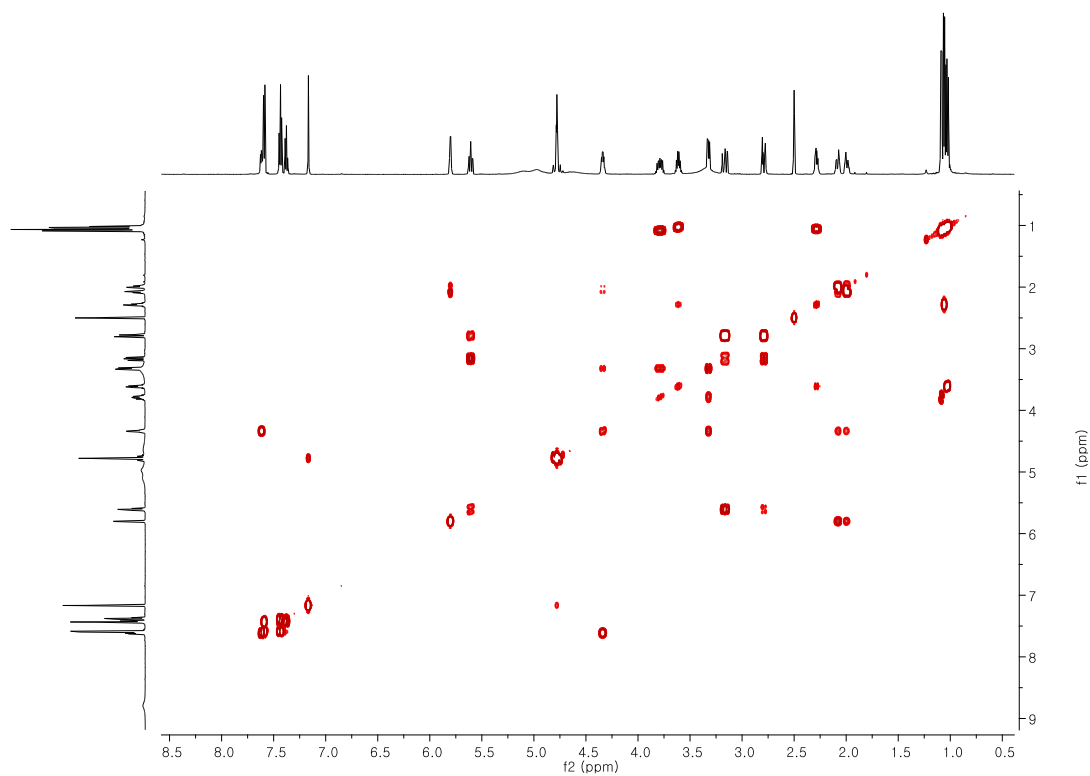

**Figure S4.** HSQC NMR spectrum of actinoflavoside B (**1**) in DMSO.

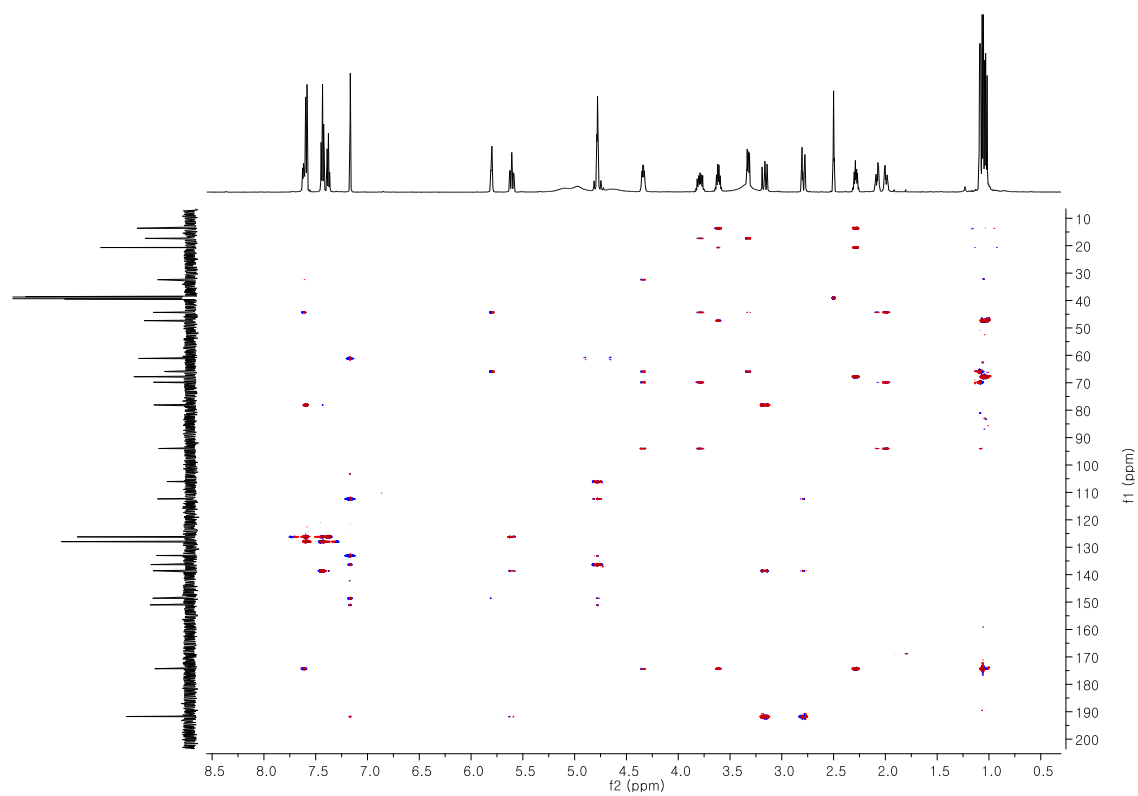

**Figure S5.** HMBC NMR spectrum of actinoflavoside B (**1**) in DMSO.

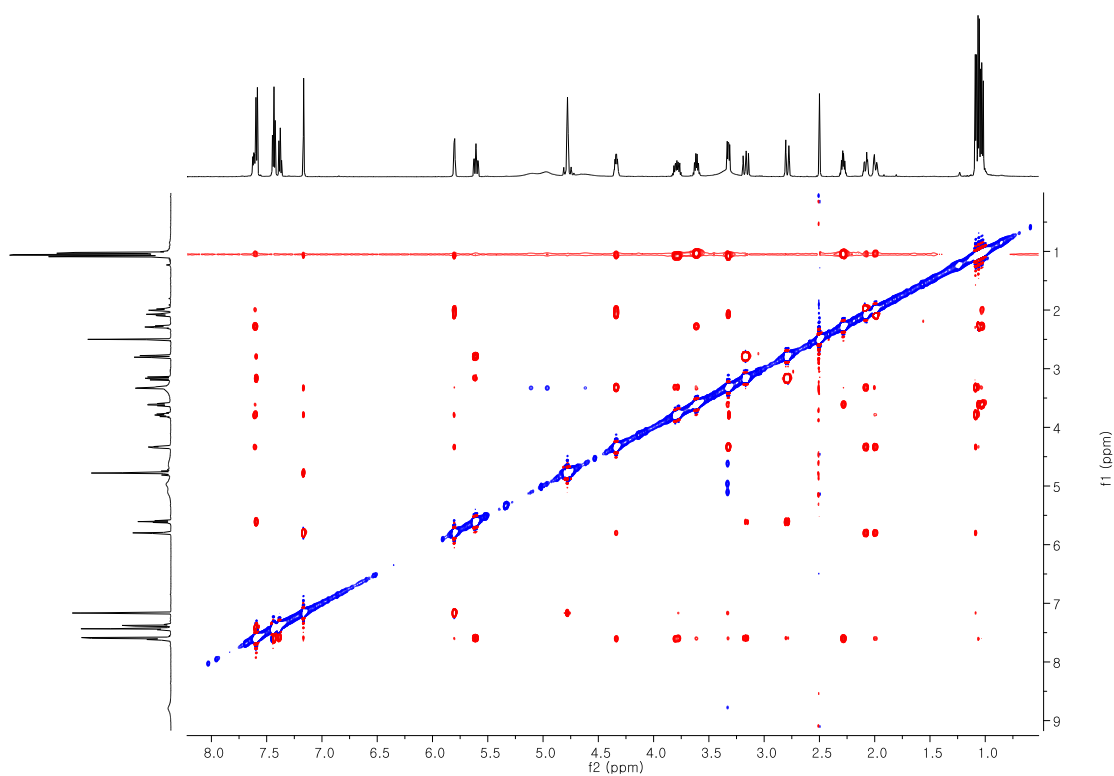

**Figure S6.** ROESY NMR spectrum of actinoflavoside B (**1**) in DMSO.

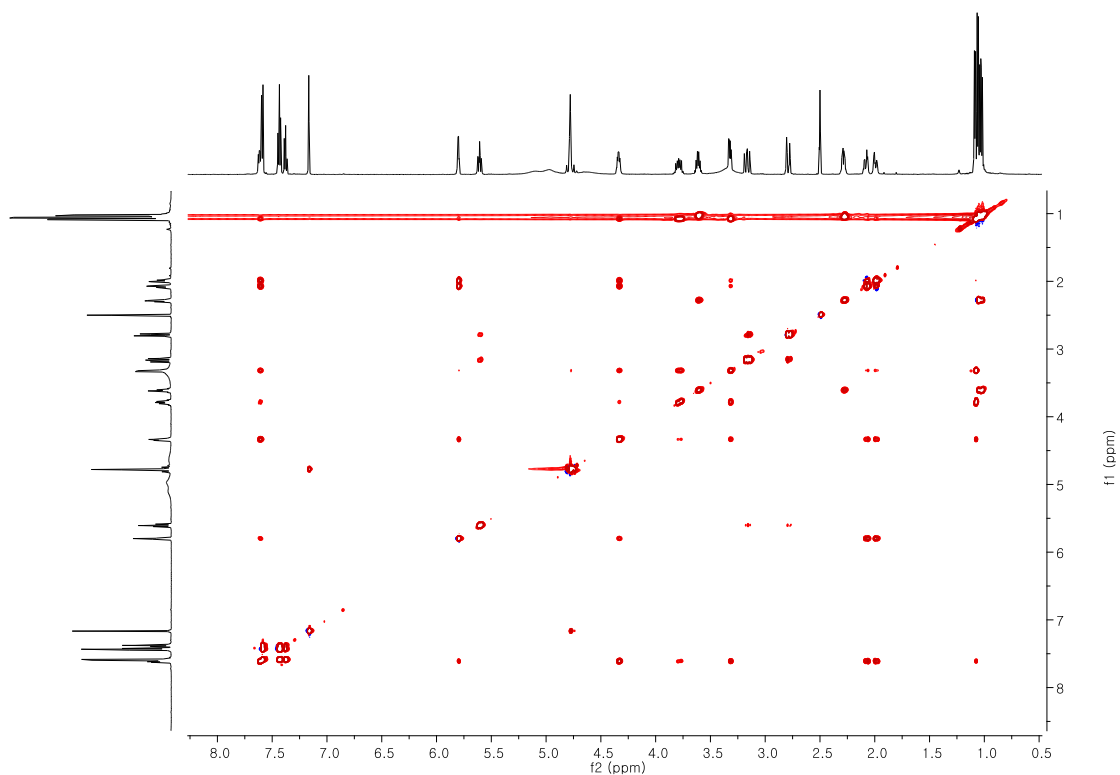

**Figure S7.** TOCSY NMR spectrum of actinoflavoside B (**1**) in DMSO.

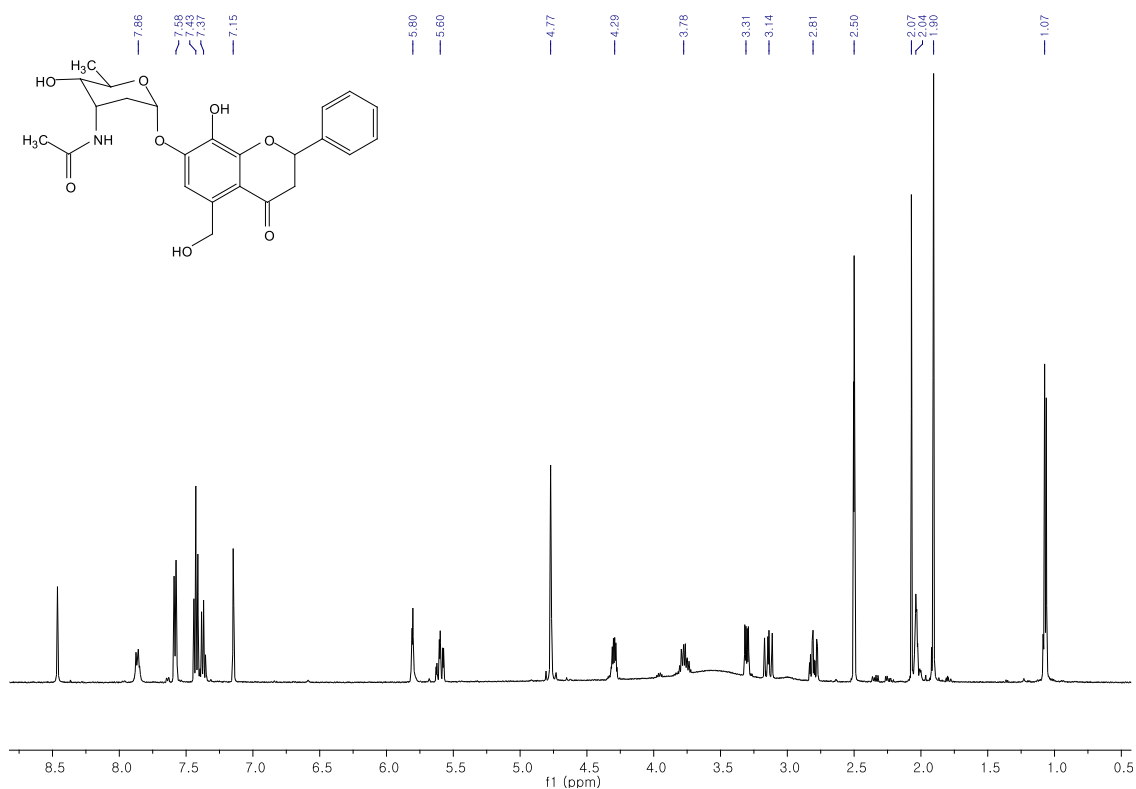

**Figure S8.**  $^1\text{H}$  NMR spectrum of actinoflavoside C (**2**) at 600 MHz in DMSO.

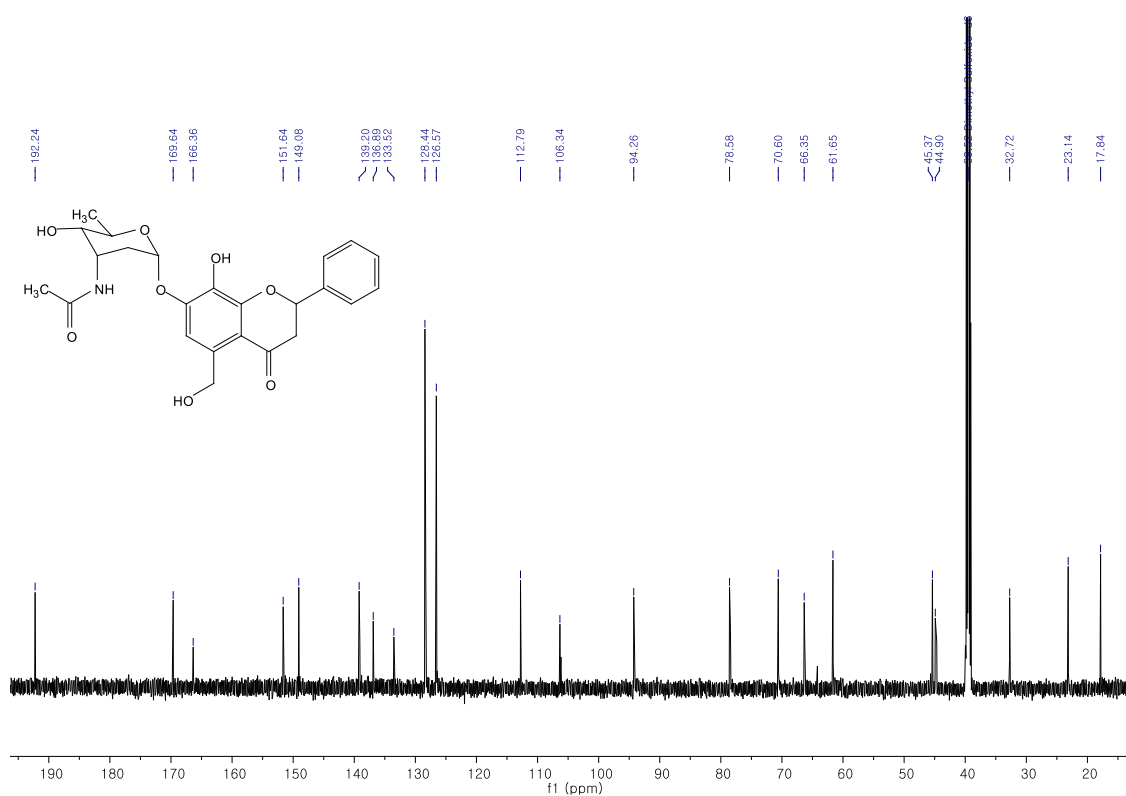

Figure S9. <sup>13</sup>C NMR spectrum of actinoflavoside C (2) at 150 MHz in DMSO.

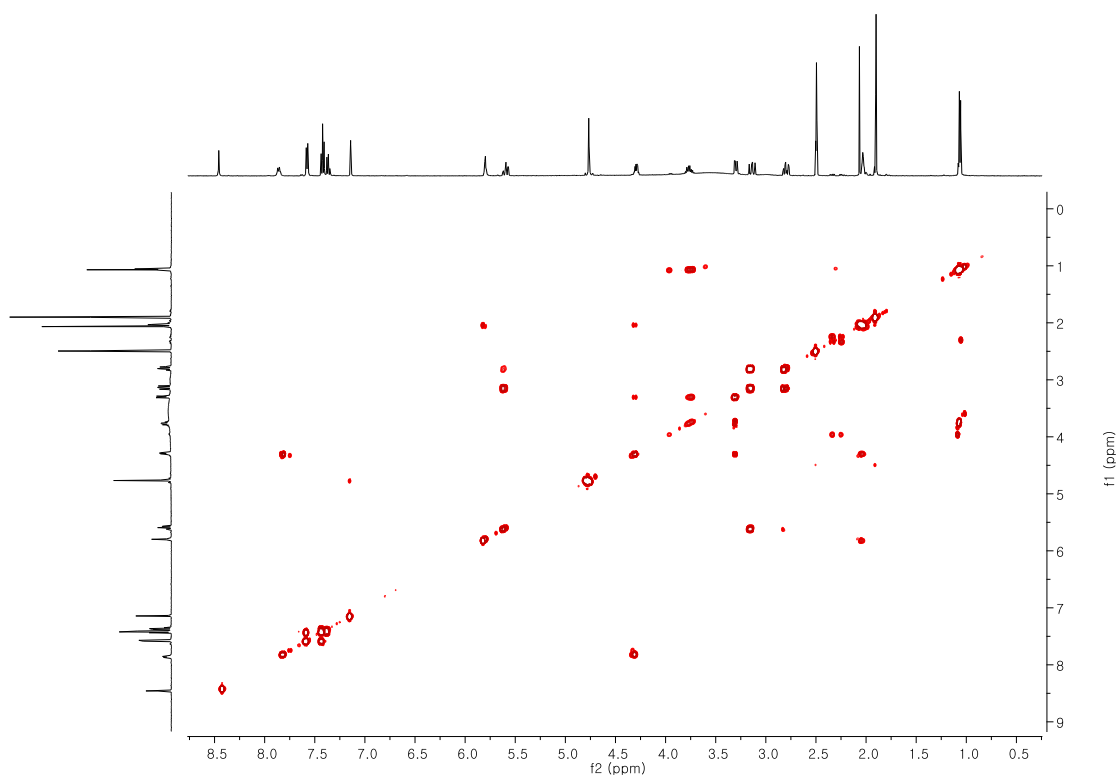

Figure S10. COSY NMR spectrum of actinoflavoside C (2) in DMSO.

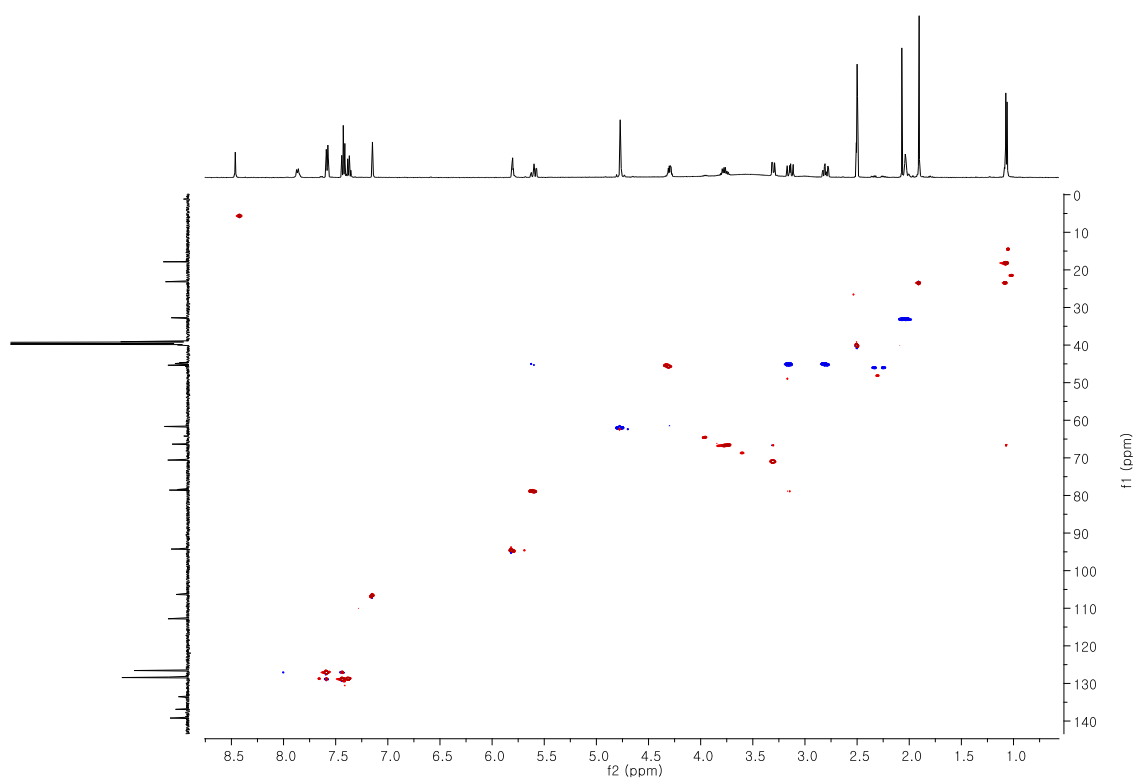

**Figure S11.** HSQC NMR spectrum of actinoflavoside C (**2**) in DMSO.

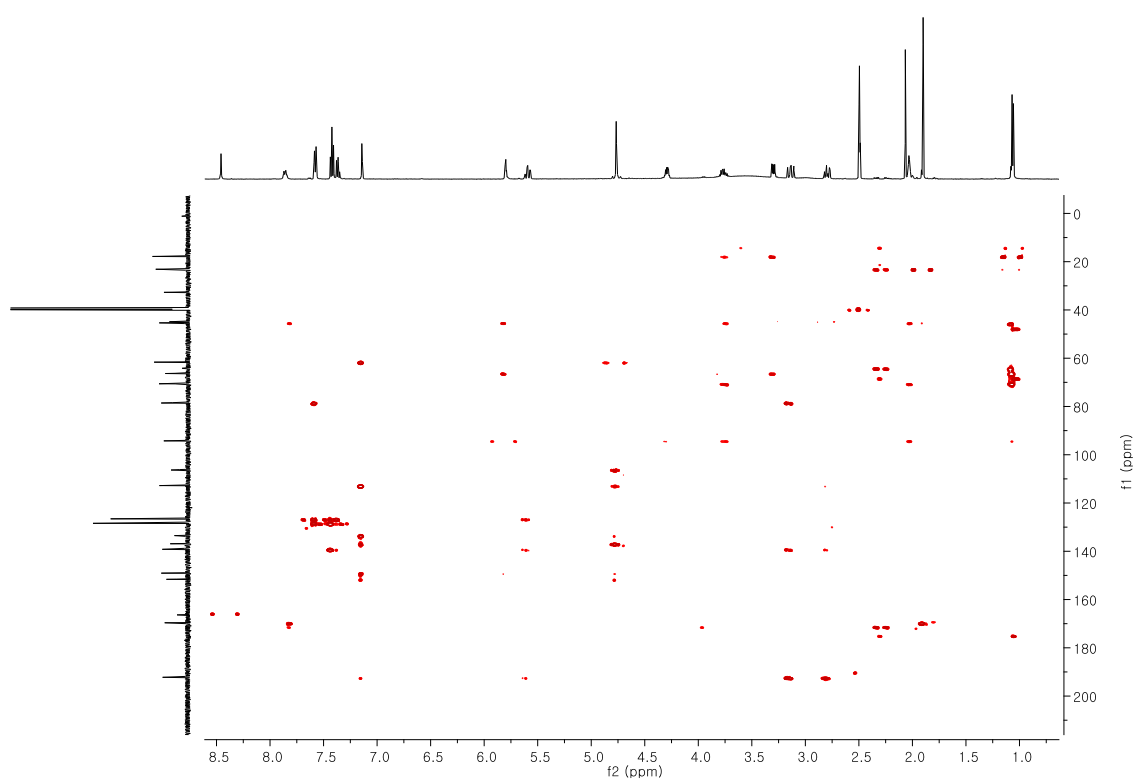

**Figure S12.** HMBC NMR spectrum of actinoflavoside C (**2**) in DMSO.

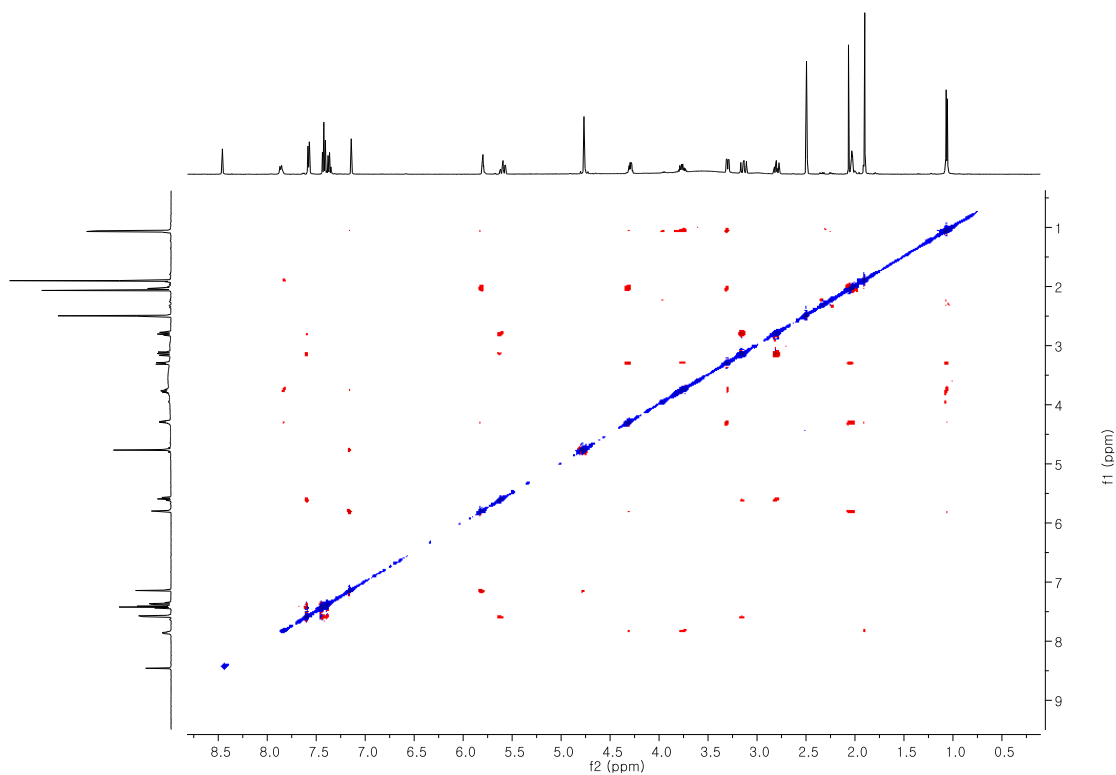

**Figure S13.** ROESY NMR spectrum of actinoflavoside C (**2**) in DMSO.

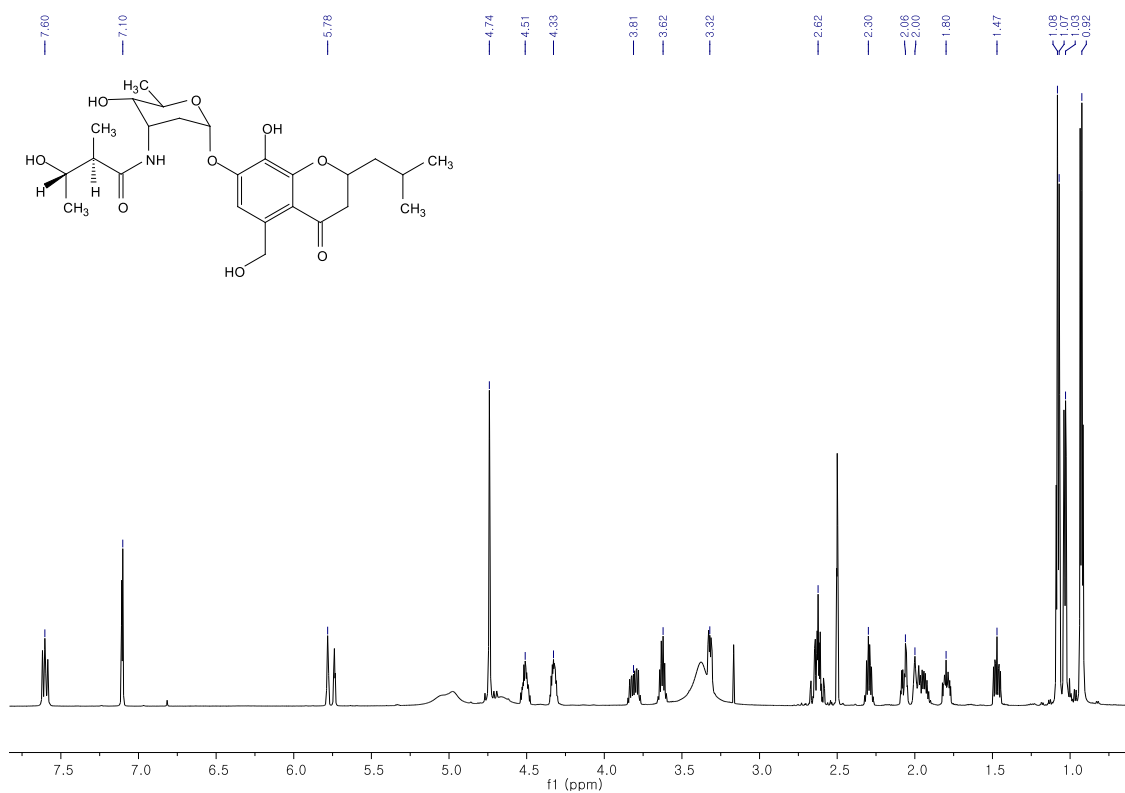

**Figure S14.**  $^1\text{H}$  NMR spectrum of actinoflavoside D (**3**) at 600 MHz in DMSO.

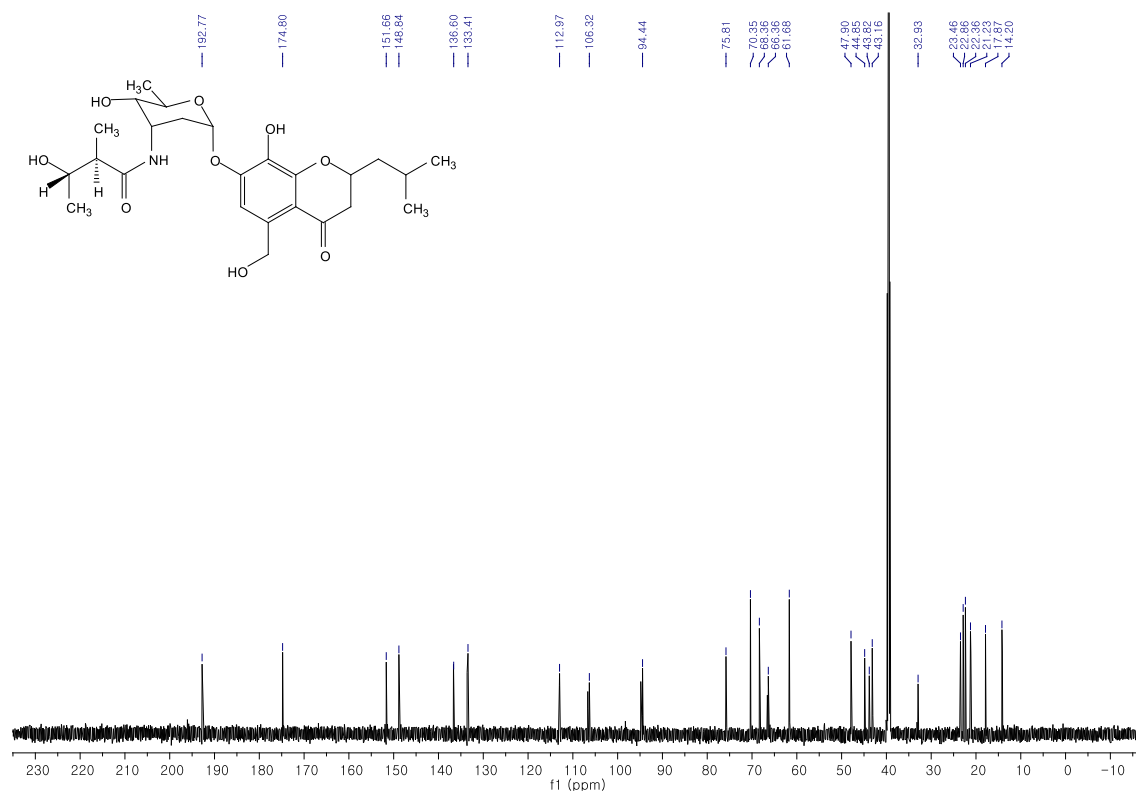

**Figure S15.**  $^{13}\text{C}$  NMR spectrum of actinoflavoside D (**3**) at 150 MHz in DMSO.

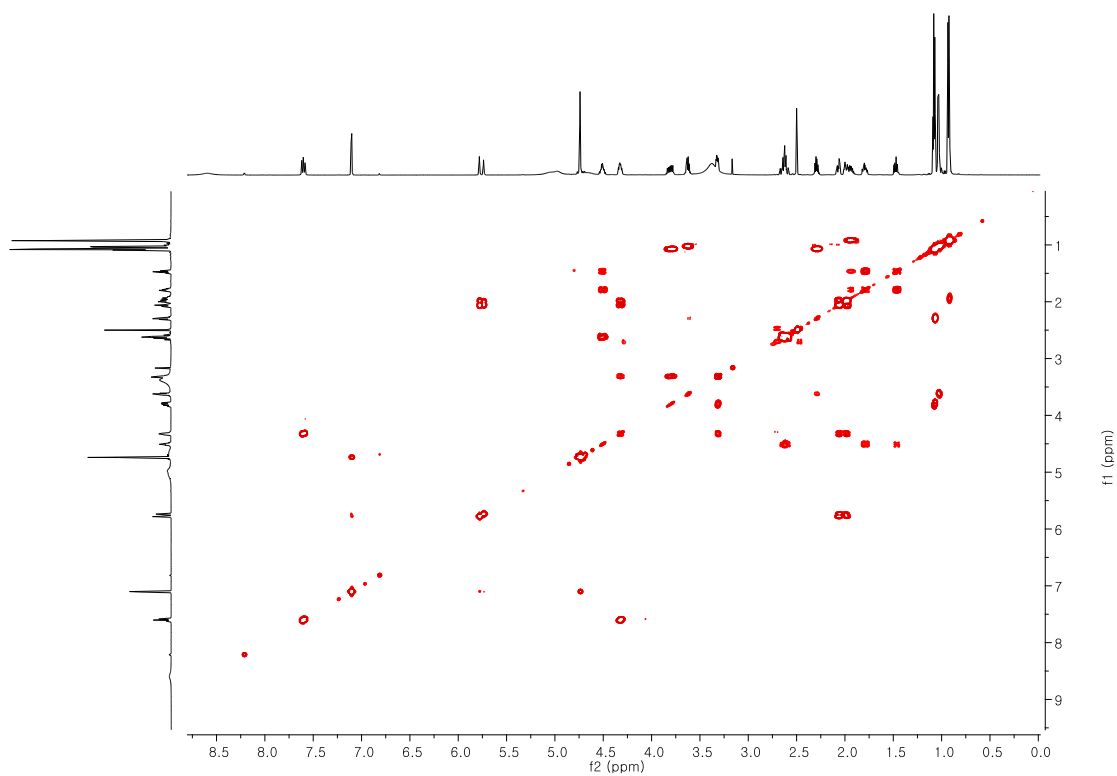

**Figure S16.** COSY NMR spectrum of actinoflavoside D (**3**) in DMSO.

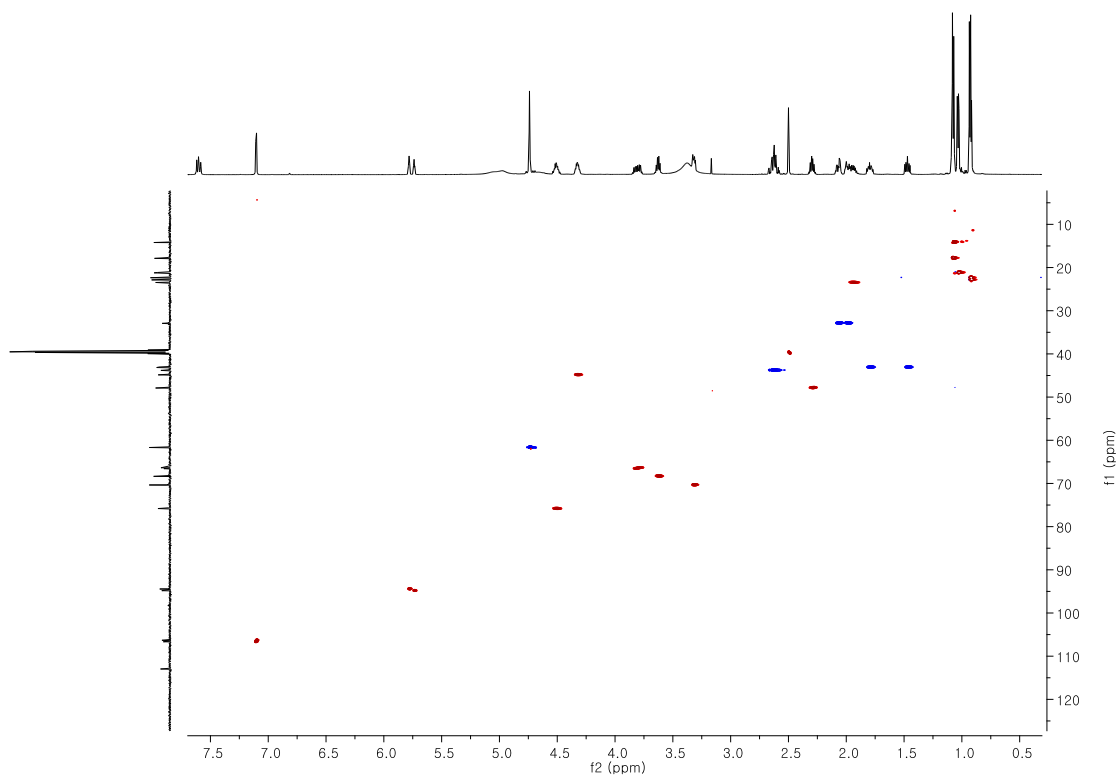

**Figure S17.** HSQC NMR spectrum of actinoflavoside D (**3**) in DMSO.

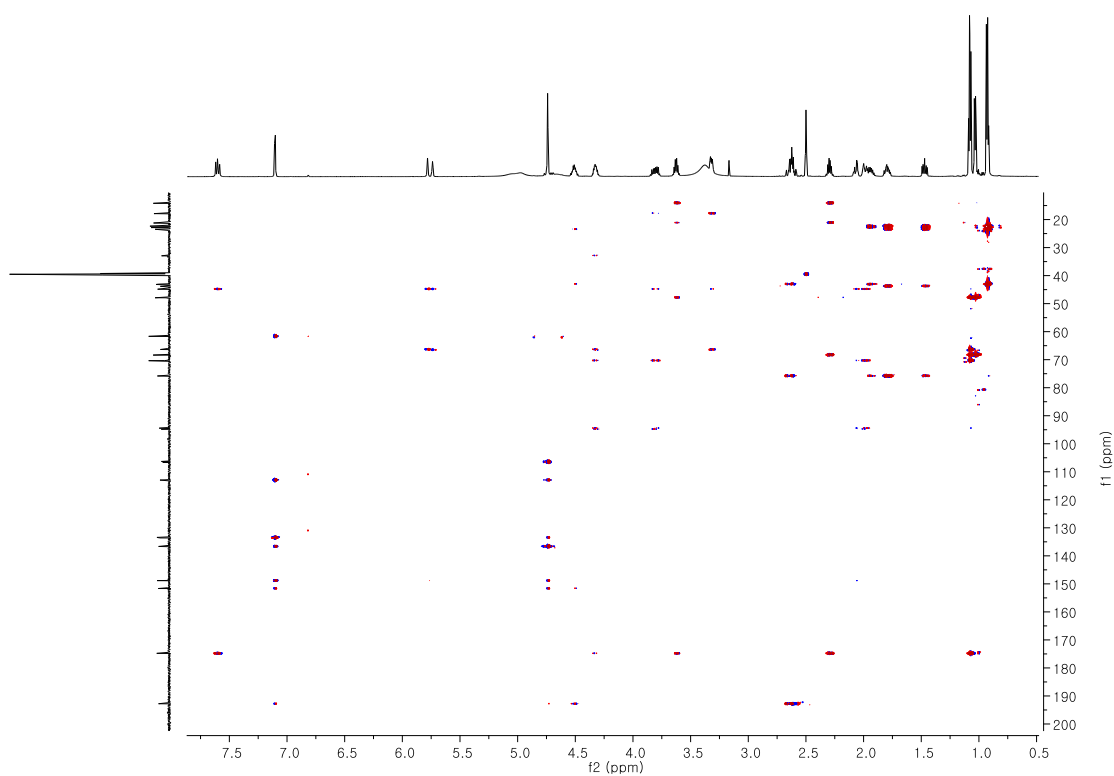

**Figure S18.** HMBC NMR spectrum of actinoflavoside D (**3**) in DMSO.

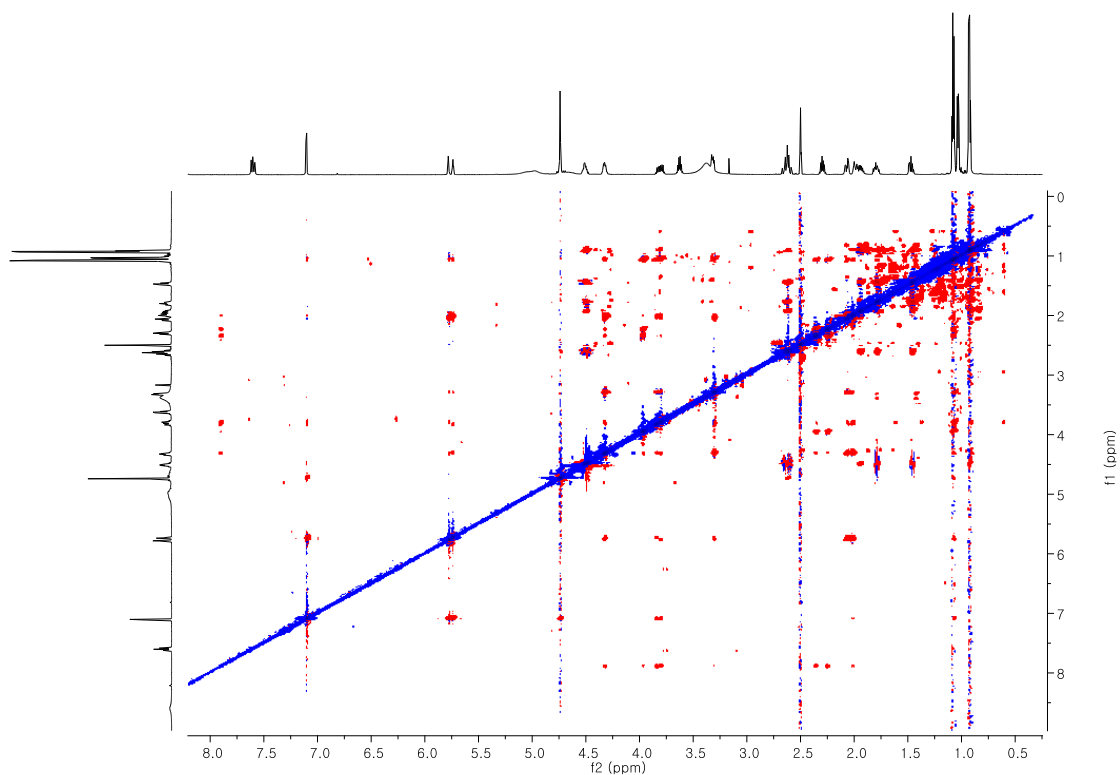

**Figure S19.** ROESY NMR spectrum of actinoflavoside D (**3**) in DMSO.

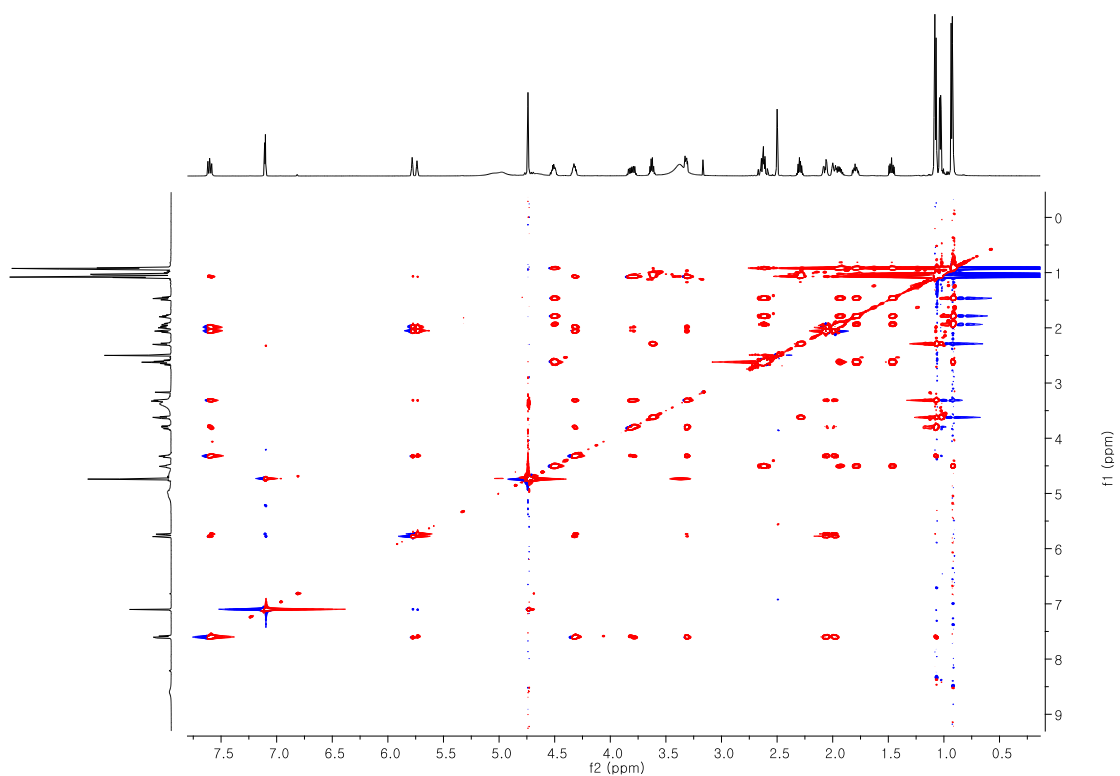

**Figure S20.** TOCSY NMR spectrum of actinoflavoside D (**3**) in DMSO.

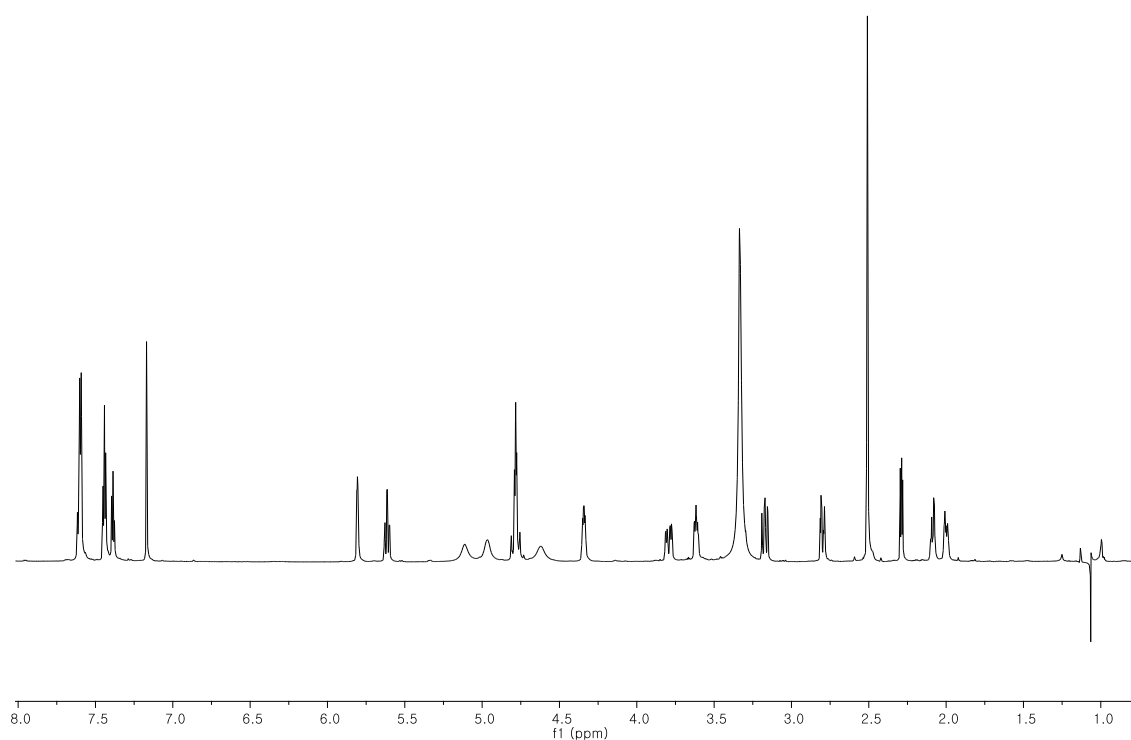

**Figure S21.** Methyl decoupling <sup>1</sup>H NMR spectrum of actinoflavoside B (**1**) at 800 MHz in DMSO.

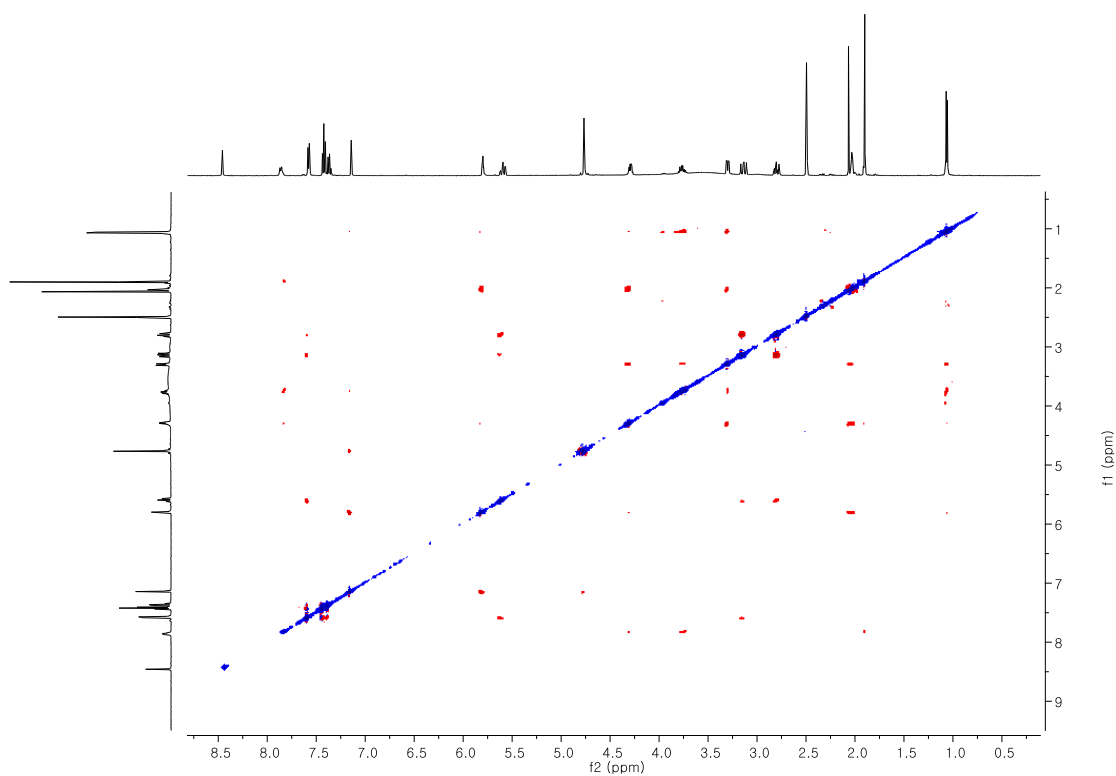

**Figure S22.** DQF-COSY NMR spectrum of actinoflavoside B (**1**) at 800 MHz in DMSO.

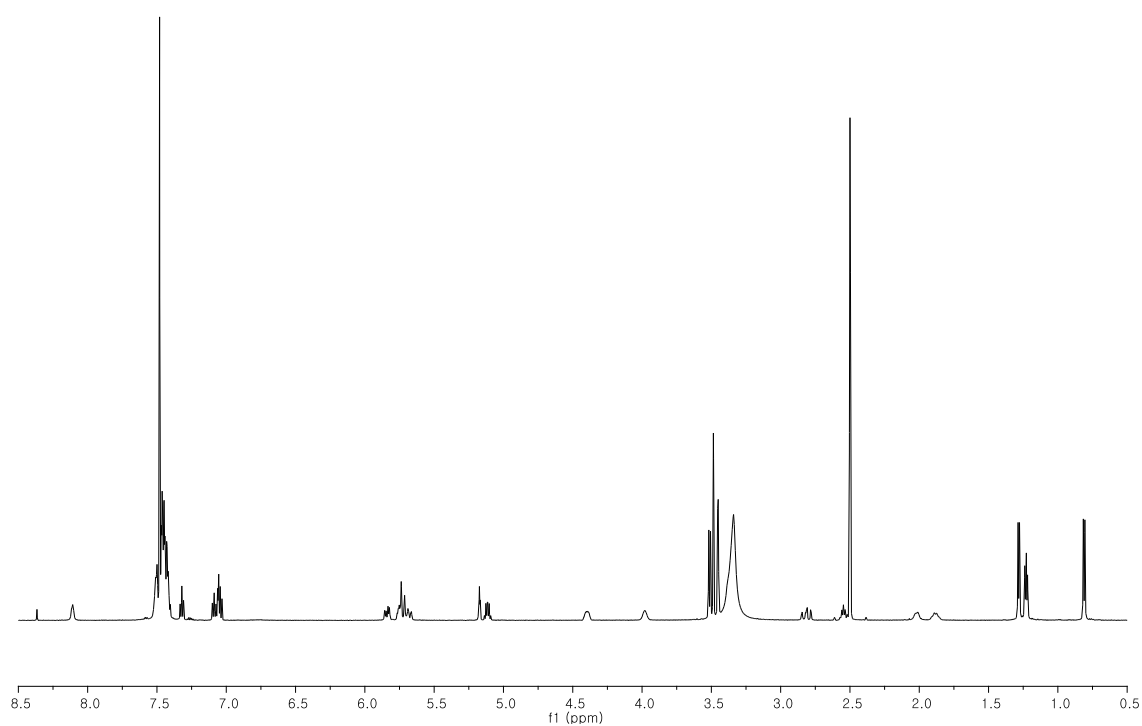

**Figure S23.**  $^1\text{H}$  NMR spectrum of S-MTPA ester (**1a**) for actinoflavoside B (**1**) at 600 MHz in DMSO.

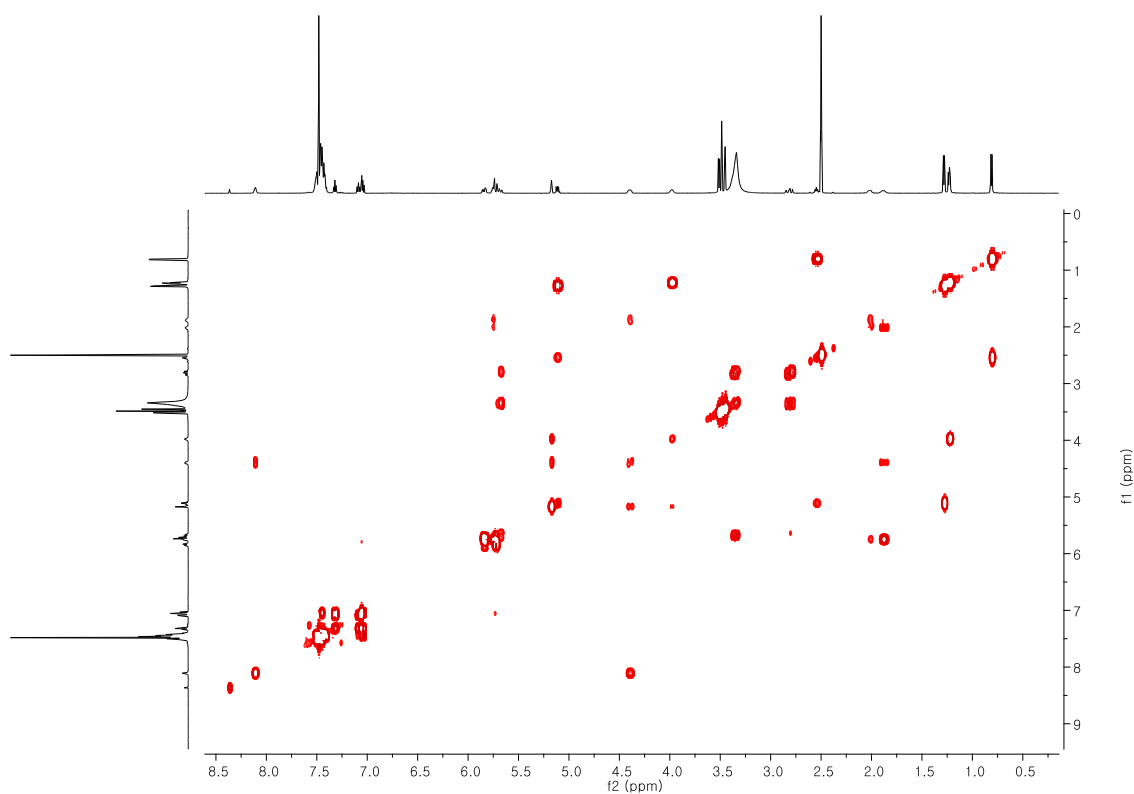

**Figure S24.** COSY NMR spectrum of S-MTPA ester (**1a**) for actinoflavoside B (**1**) at 600 MHz in DMSO.

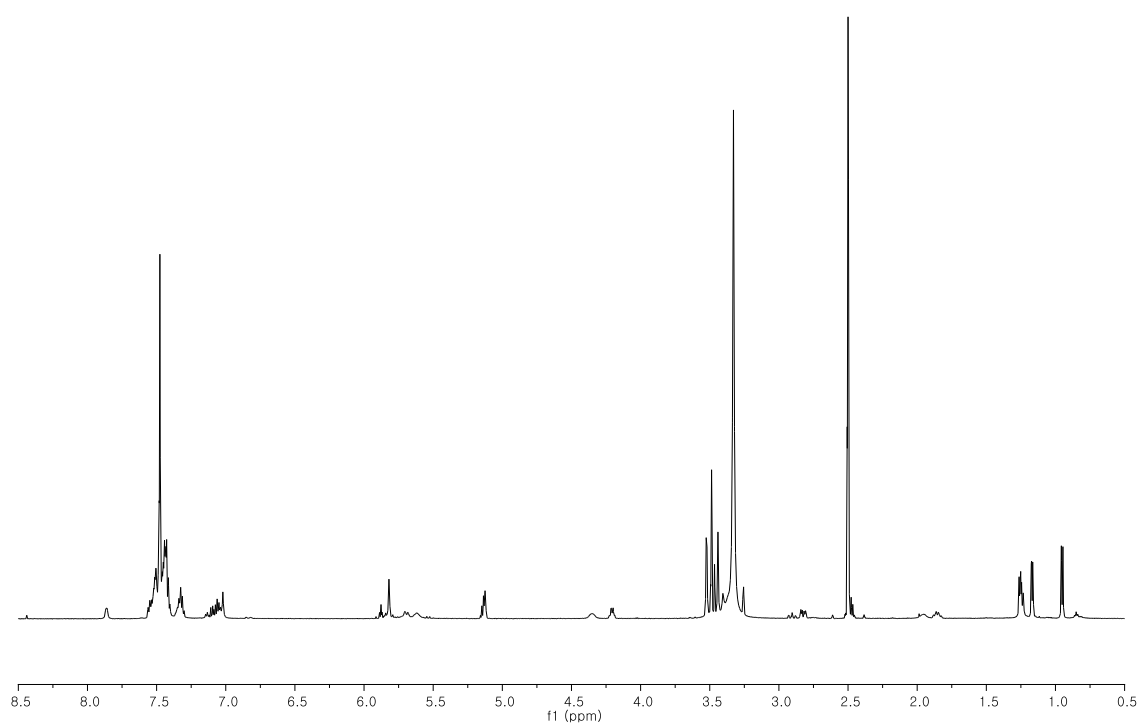

**Figure S25.**  $^1\text{H}$  NMR spectrum of R-MTPA ester (**1b**) for actinoflavoside B (**1**) at 600 MHz in DMSO.

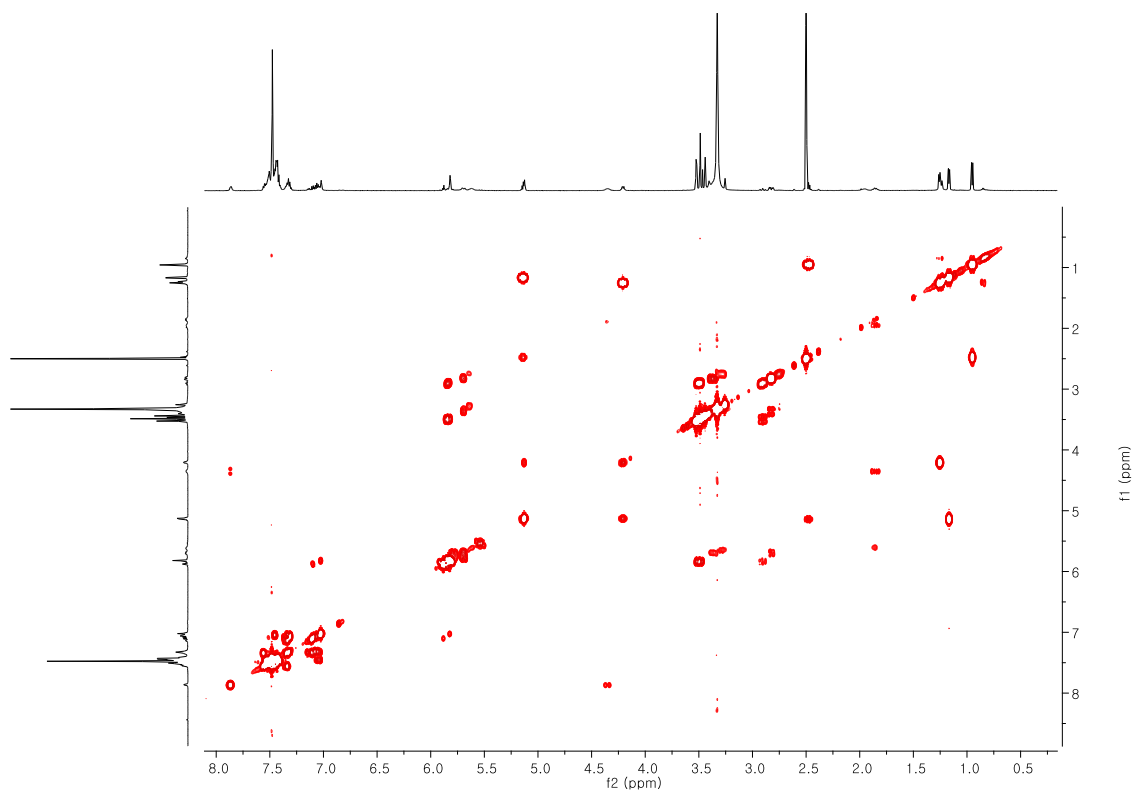

**Figure S26.** COSY NMR spectrum of R-MTPA ester (**1b**) for actinoflavoside B (**1**) at 600 MHz in DMSO.

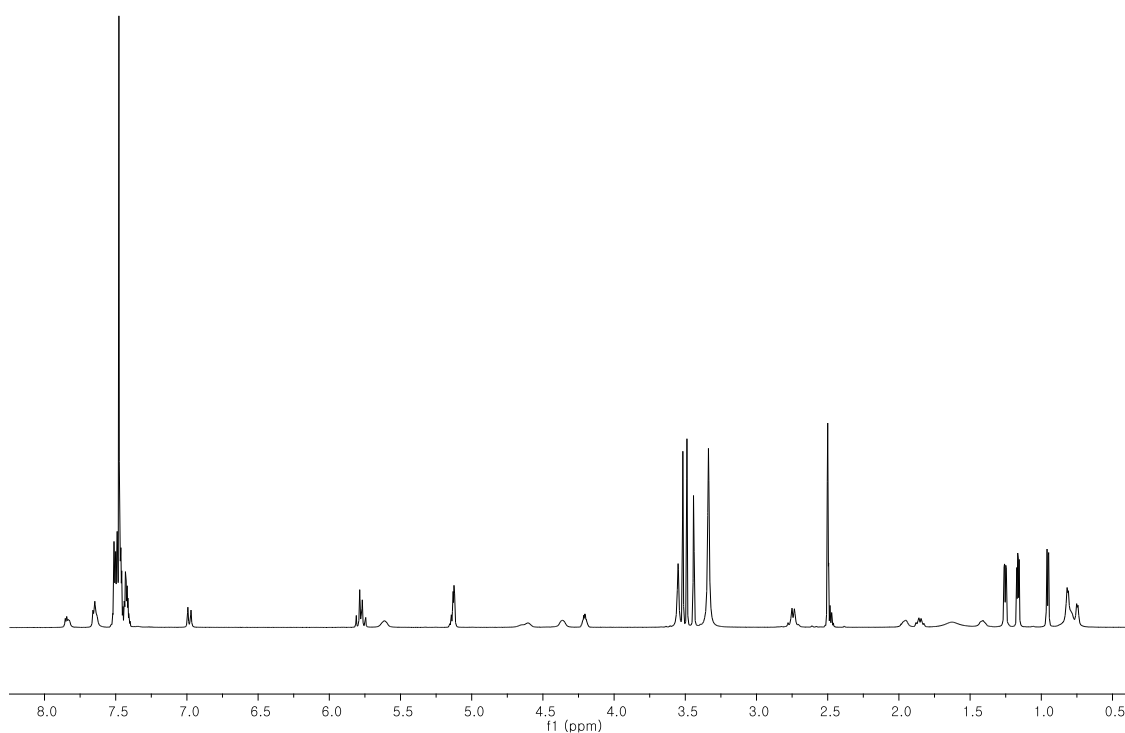

**Figure S27.**  $^1\text{H}$  NMR spectrum of S-MTPA ester (**3a**) for actinoflavoside D (**3**) at 600 MHz in DMSO.

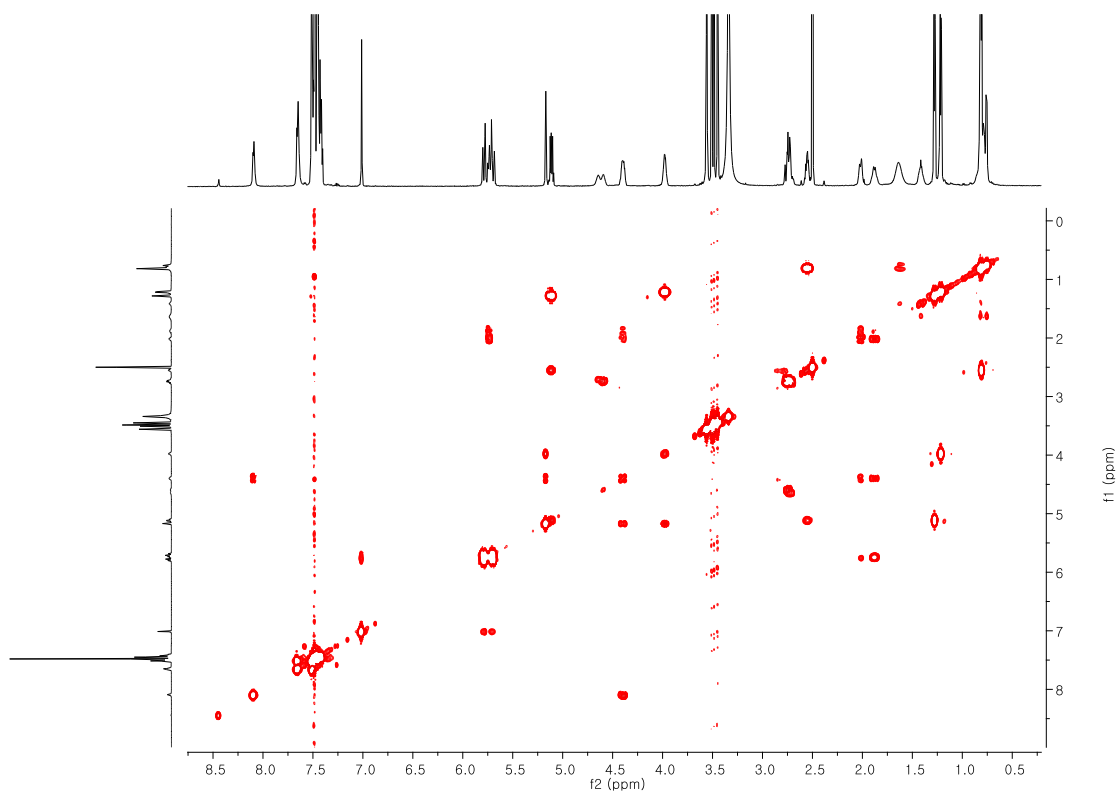

**Figure S28.** COSY NMR spectrum of S-MTPA ester (**3a**) for actinoflavoside D (**3**) at 600 MHz in DMSO.



**Figure S29.**  $^1\text{H}$  NMR spectrum of R-MTPA ester (**3b**) for actinoflavoside D (**3**) at 600 MHz in DMSO.

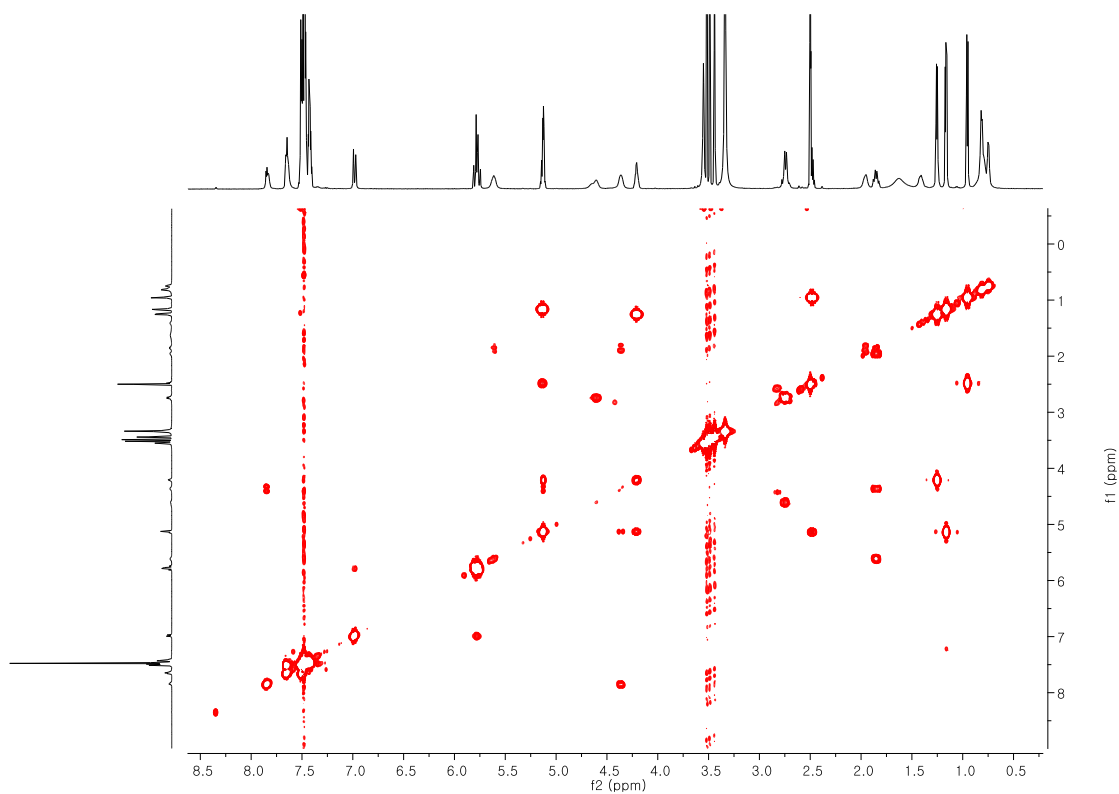

**Figure S30.** COSY NMR spectrum of R-MTPA ester (**3a**) for actinoflavoside D (**3**) at 600 MHz in DMSO.

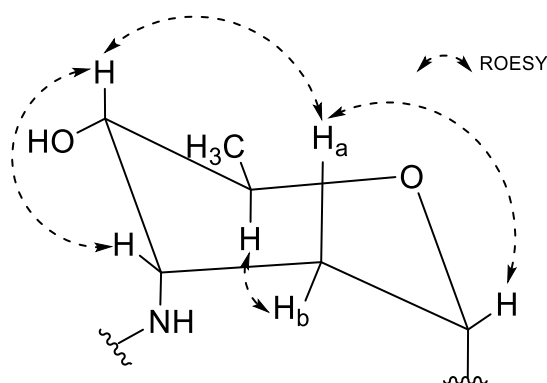

**Figure S31.** Key ROESY correlations of the 2, 3, 6-trideoxyaminosugar of acitnoflavoside B (**1**).

GCAGTGGGTATCGAGGCGGGCACTTAATGCGTTAGCTGCGGCACGGACGACGTGGAATGTCGCCCACAC  
CTAGTGCCACCGTTTACGGCGTGGACTIONACCAGGGTATCTAATCCTGTTCGCTCCCCACGCTTTCGCTCC  
TCAGCGTCAGTATCGGCCCAGAGATCCGCCTTCGCCACCGGTGTTCTCCTGATATCTGCGCATTTACCC  
GCTACACCAGGAATTCCGATCTCCCCTACCGAACTCTAGCCTGCCCCGTATCGACTGCAGACCCGGGGTTA  
AGCCCCGGGCTTTCACAACCGACGTGACAAGCCGCCTACGAGCTCTTTACGCCCAATAATTCCGGACAAC  
GCTCGCGCCCTACGTATTACCGCGGCTGCTGGCACGTAGTTAGCCGGCGCTTCTTCTGCAGGTACCGTCA  
CTTTCGCTTCTTCCCTGCTGAAAGAGGTTTACAACCCGAAGGCCGTCATCCCTCACGCGGCGTCGCTGCA  
TCAGGCTTTCGCCCATTGTGCAATATCCCCACTGCTGCCTCCCGTAGGAGTCTGGGCCGTGTCTCAGTC  
CCAGTGTGGCCGGTCGCCCTCTCAGGCCGGCTACCCGTCGTCGCCTTGGTGAGCCATTACCTCACCAACA  
AGCTGATAGGCCGCGGGCTCATCCTGCACCGCCGGAGCTTTCGAACCTCACAGATGCCCGTGAGGGTCAG  
TATCCGGTATTAGACCCCGTTTCCAGGGCTTGTCCAGAGTGCAGGGCAGATTGCCACGTGTTACTCAC  
CCGTTCCGCCACTAATCCCCACCGAAGTGGTTCATCGTTCGACTTGCATGTGTTAAGCACGCCGCCAGCGT  
TCGTCCTGAGCAGAAAAAAAACCTAAAAAACCGTACAATCCGGCGGAACATGAGGCTTAATTCCCAGGC  
AACGGCAAAAAACCTTAACCAAGGCTTGAATACACCGGGAAAACCATAGAAAATAGTGCCCCCCTTGG  
GGCCGGGGACAAGGTGGTGCAAGGGTATCCCTCCCCCCCCTGGCCCGGAAAAATTGGGGGTAAATCCCTC  
CCAAAGGGGCAACCCATGTGTCGCTGGTGTGCCCGCAAGACACTCTCTGTGTGGTGTGGGAGAGCTCTCG  
AACACACCCCGCGGCGGAATCTCACAGGAAAAGGGTGGAGCGACCACTCAATCCACATCCACCCCCCCT  
CTTATTGGGGGGGGGGAAAT

**Figure S32.** 16S rDNA sequence data of JML48.

GGGGGGCGACGTTGGGACTAGGTGTTGGCGACATTCCACGTCGTCGGTGCCGCAGCTAACGCATTAAGTT  
CCCCGCCTGGGGAGTACGGCCGCAAGGCTAAAACTCAAAGGAATTGACGGGGGCCCCGCACAAGCAGCGGA  
GCATGTGGCTTAATTCGACGCAACGCGAAGAACCTTACCAAGGCTTGACATACACCGGAAAGCATCAGAG  
ATGGTGCCCCCTTGTGGTCGGTGTACAGGTGGTGCATGGCTGTCGTCAGCTCGTGTCTGTGAGATGTTGG  
GTTAAGTCCCGCAACGAGCGCAACCCTTGTCTGTGTTGCCAGCATGCCCTTCGGGGTGATGGGGACTCA  
CAGGAGACTGCCGGGGTCAACTCGGAGGAAGGTGGGGACGACGTCAAGTCATCATGCCCCTTATGTCTTG  
GGCTGCACACGTGCTACAATGGCCGGTACAATGAGCTGCGATGCCGCGAGGCGGAGCGAATCTCAAAAAG  
CCGGTCTCAGTTCGGATTGGGGTCTGCAACTCGACCCCATGAAGTCGGAGTTGCTAGTAATCGCAGATCA  
GCATTGCTGCGGTGAATACGTTCCCGGGCCTTGTACACACCGCCCGTCACGTCACGAAAGTCGGTAACAC  
CCGAAGCCGGTGGCCCAACCCCTTGTGGGAGGGAGCTGTGCAAGGTGGGACTGGCGATTGGGACGAAGTC  
GTAACAAGGTAGCCGTACCGGAAGGTGCGGCTGGATCCCCCCCCCTTTTATAAAAAAAAAAAATTGGTTG  
AGAAATTATTGTAGGGGAAATTCTGGGTCCAAGGTTCCCTTTCCACACCGTTGTTTCCCCCACATTGT  
GGGCTATTTTCGTCCGCGGCAAAGTATTCCAAATTTTCCCGAGCCCACTTTAAGCCGGGGCGAAAAAGGGG  
GGGTAAACCCAGGGTTTAATCCAGAGGTTTTTAAAGGGGAGTAGATATACCGCCCAAAAAACAATATTA  
ATGGCCCCCCCATTTTTGAAGAAAGATGTGCGCGCTCCTAATATGACTACCCCGCCCGCGGCGGGAAAT  
AATCTTGGCTGGCTTCTCCTCCCGGGGAGGGGCCGTTTTTTTTTTTTTTTCTTGCTGGGCAAGAAGTTCT  
GTTTTTAGGAGGGAGAGGGGCCCCCCCCACCCGAGCGGGGCGCCGTCCCTAACGATGAGGGGGGGGAGGG  
AGAAGAAAAAAAAATCTACACCACCCCCCCCCCCCCCTTCTCAGAGAGGGAGGGGGCGGGGGGGCGGGT  
TGTACCAATTGGGGGGTGGAGGGAGCCCTCTCCTCCCTCCACGGGGCGCGCCCCCCTCCCTCCCTAGT  
GGTGTGTGTGGTGCTTTCTCAACGCAAAGGGGGGGGGCGGCGCCCCCCCCCTACCACATAGTTGCTCCTA  
TCTCTCTCCCCTAGGAGGAGGAGAGGAAGTATAAAACTTCCTCCCCCCCCCCCCCCCCGGGGGAAAAAA

**Figure S33.** 16S rDNA sequence data of JMS33.

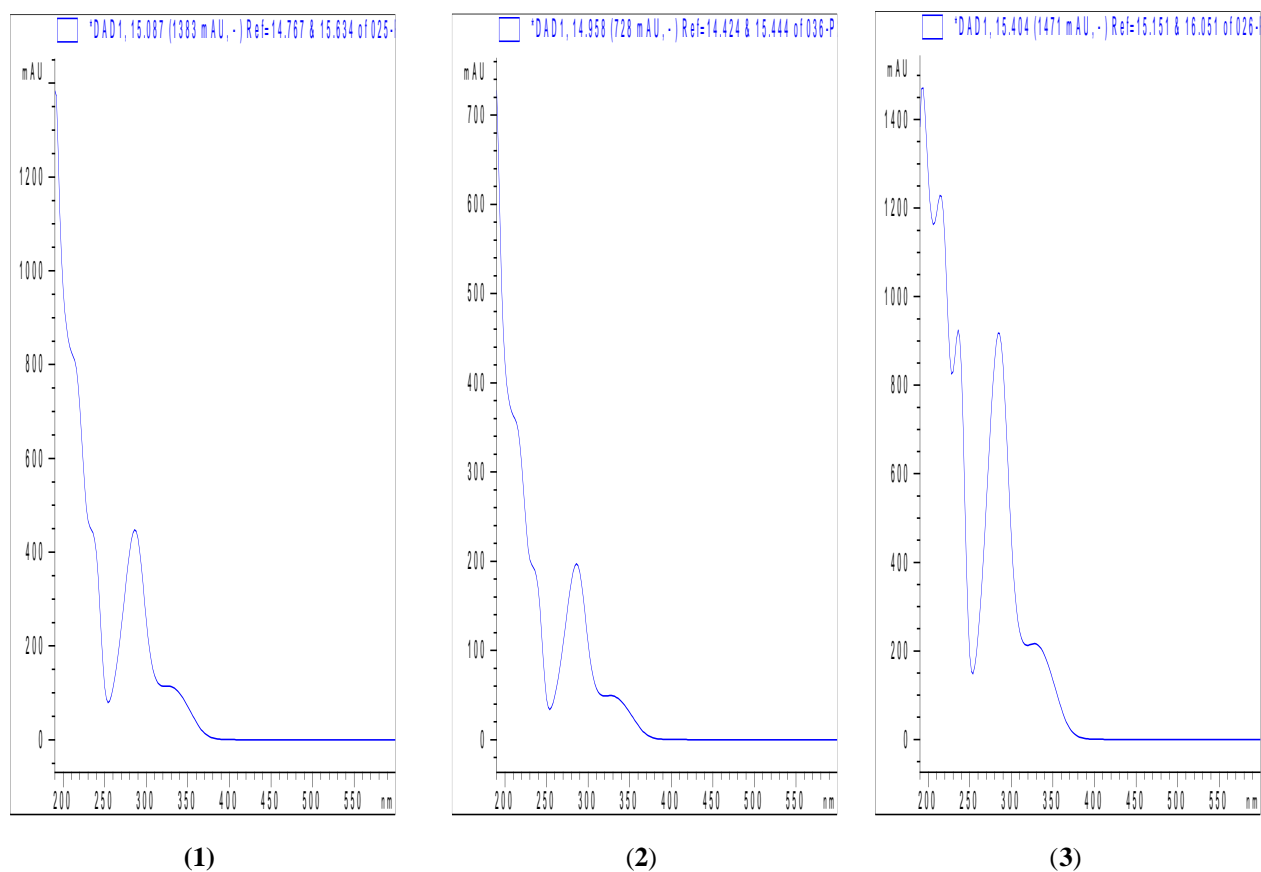

**Figure S34.** UV spectrum of actinoflavoside B-D (1-3).

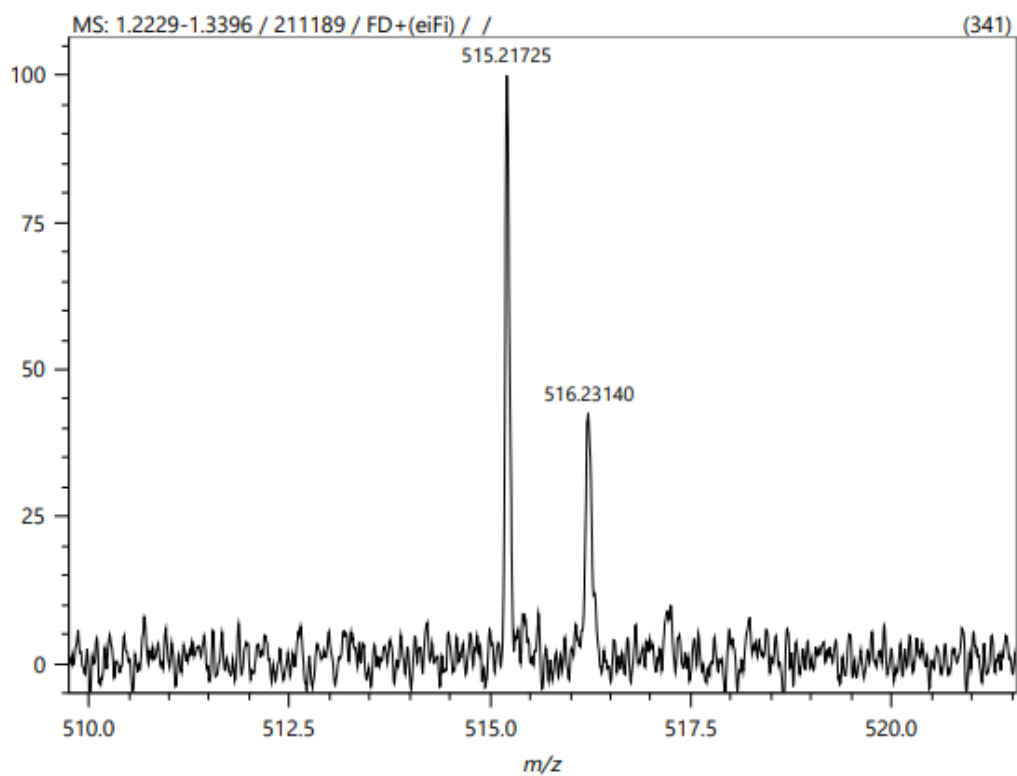

**Figure S35.** HR-TOF-MS data of actinoflavoside B (1).

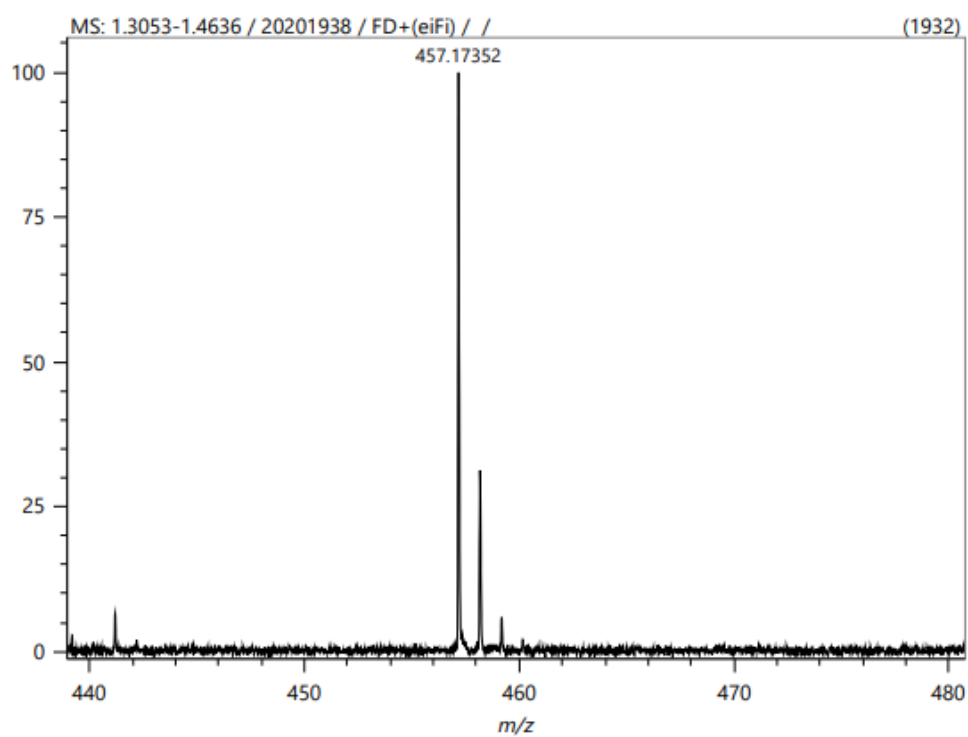

**Figure S36.** HR-TOF-MS data of actinoflavosdie C (**2**).

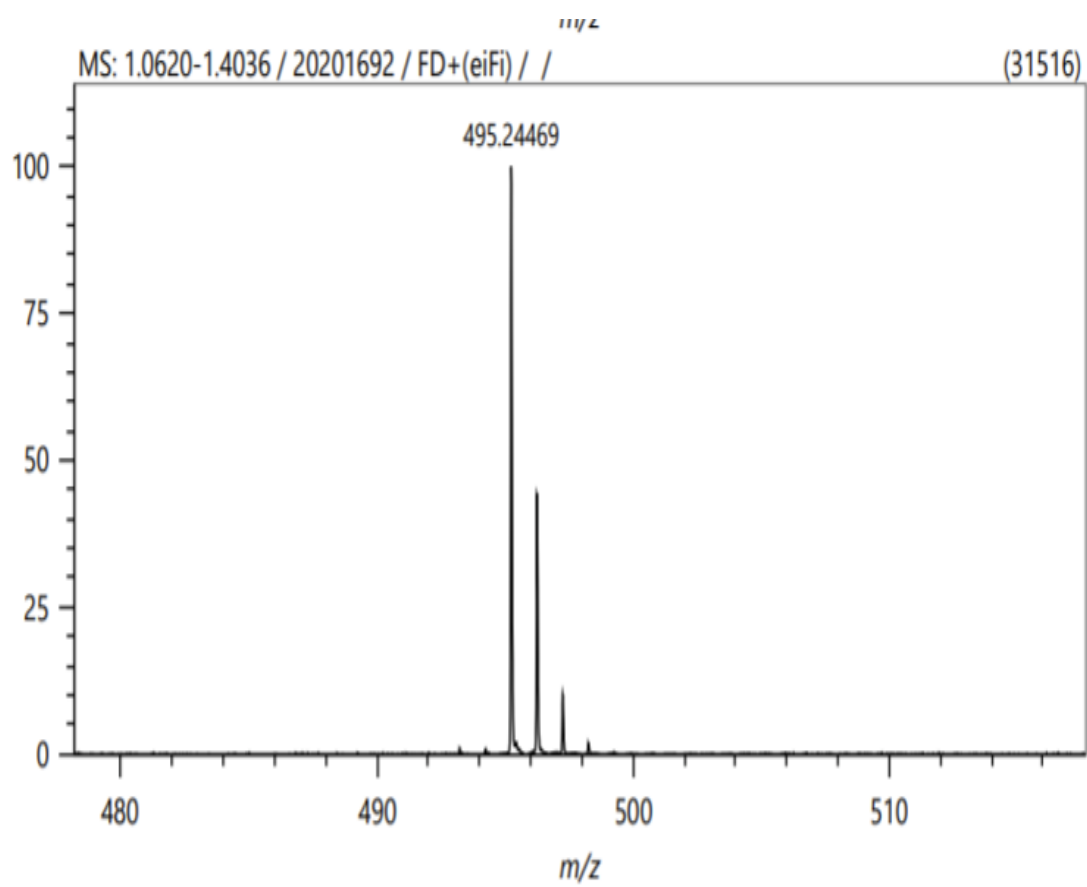

**Figure S37.** HR-TOF-MS data of actinoflavosdie D (**3**).

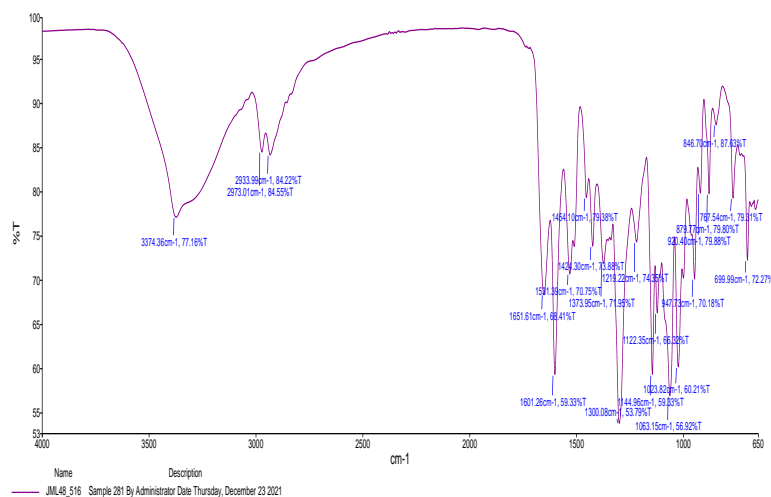

**Figure S38.** IR spectrum of actinoflavosdie B (1).

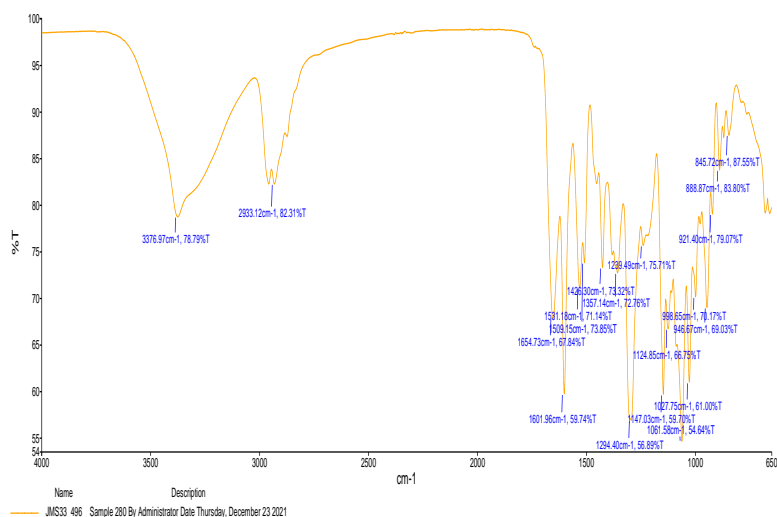

**Figure S39.** IR spectrum of actinoflavosdie C (2).

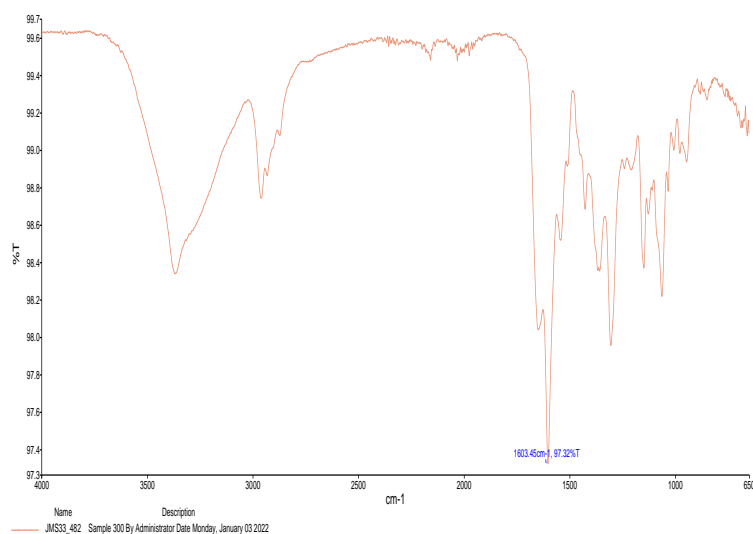

**Figure S40.** IR spectrum of actinoflavosdie D (3).

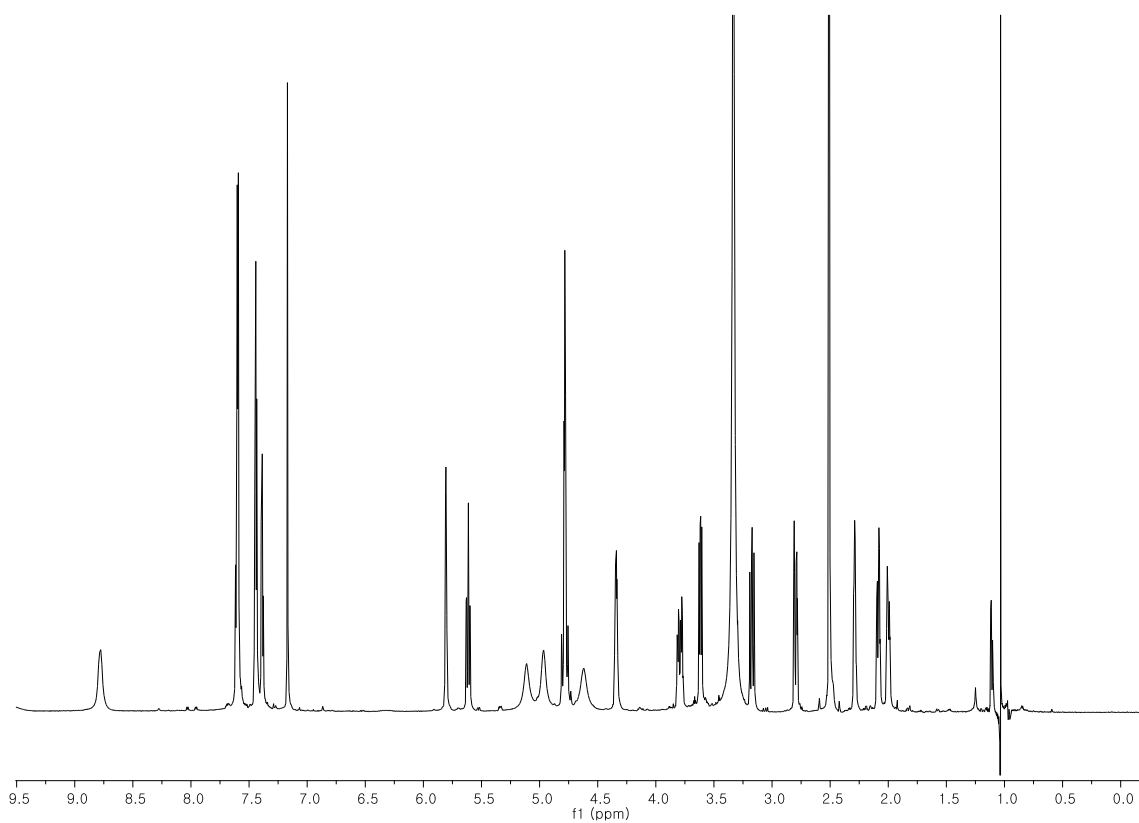

**Figure S41.** H-4''' decoupling  $^1\text{H}$  NMR spectrum (800 MHz) of actinoflavoside B (**1**) in DMSO.

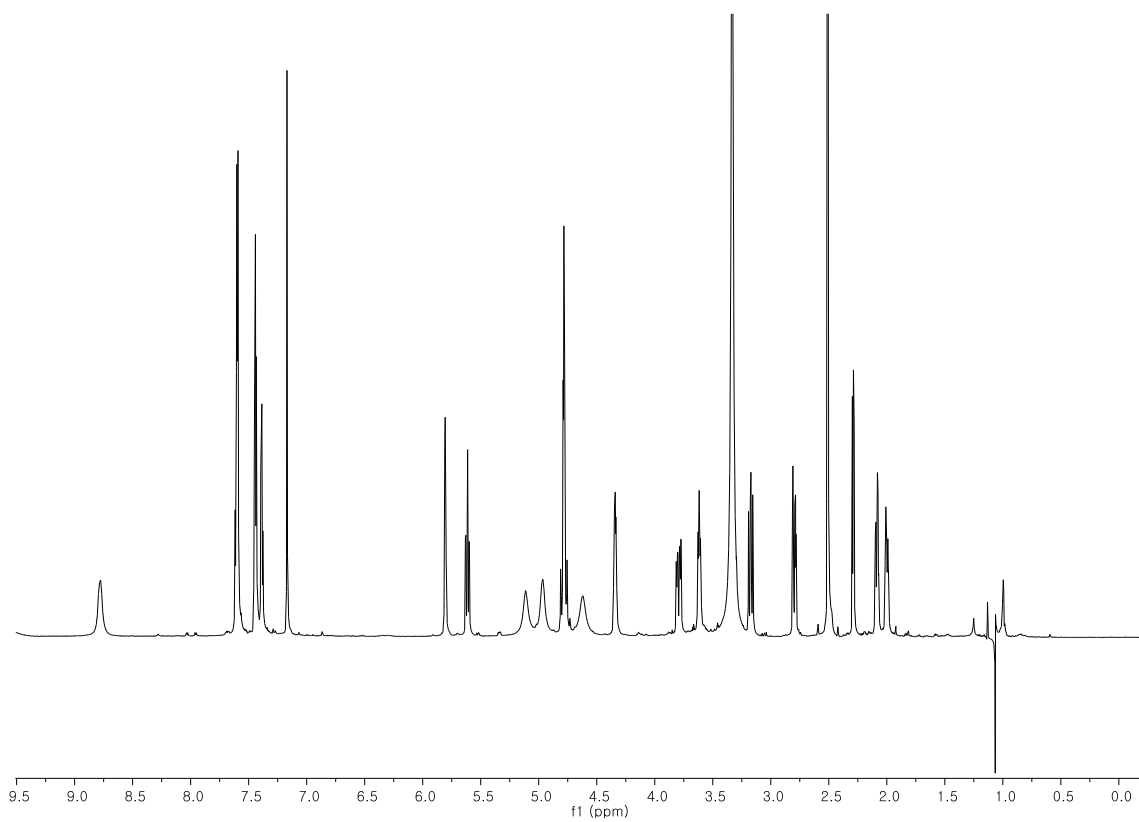

**Figure S42.** H-5''' decoupling  $^1\text{H}$  NMR spectrum (800 MHz) of actinoflavoside B (**1**) in DMSO.

| Compound   | MIC (mM)           |                      |                   |                       |
|------------|--------------------|----------------------|-------------------|-----------------------|
|            | Gram (+) Bacteria  |                      | Gram (-) negative |                       |
|            | <i>B. subtilis</i> | <i>P. aeruginosa</i> | <i>E. coli</i>    | <i>Er. rhapontici</i> |
|            | ATCC 6051          | KCTC 22073           | ATCC 11775        | ATCC 29283            |
| <b>1</b>   | 0.14               | 0.29                 | -                 | -                     |
| <b>2</b>   | -                  | -                    | -                 | -                     |
| <b>3</b>   | -                  | 0.3                  | -                 | -                     |
| Gentamicin | 0.42               | 0.42                 | 0.42              | 0.42                  |

**Table S1.** Minimum inhibitory concentration (MIC) of **1–3** against Gram-positive and Gram-negative bacterial strains.
